# Supplementary material for: Identifying dynamical modules from genetic regulatory systems: applications to the segment polarity network
Source: PubMed Central journal article supplement (PMC2233651; doi:10.1186/1471-2105-8-413), 2007-10-25
Supplement: 1471-2105-8-413-S1.pdf [file 1471-2105-8-413-S1.pdf]

## Supporting Text 1: Procedure to identify every subsystem

Here, we describe a 2-stage method for identifying every subsystem in a Boolean network model. As an input for the method, we only require a set attractors  $\mathbb{A} = \{A_1, \dots, A_r\}$ , where each attractor  $A = \{\mathbf{z}_0, \dots, \mathbf{z}_{p-1}\} \in \mathbb{A}$  is a (repeating) series of discrete states for the whole network / system. Therefore, the same method can be applied to any set of discrete state, discrete time attractors (without a Boolean network model). *Supporting Text 3* also provides some additional examples that demonstrate the main features of the method (in a less formal manner).

The two stages are described in Sections S1.2 and S1.3 below, which involve identifying every partial state sequence  $P$  that satisfies Definitions 5 and 6 in the main text. Section S1.2 describes how to identify every *partition sequence* (satisfying Definition 5). These provide a hierarchical breakdown of the attractors and are used as the basis for identifying every *subsystems* (satisfying Definition 6) in Section S1.3. In both of these stages, we look for partial state sequences that *occur* in attractors (i.e. satisfy Definition 3 of the main text). Therefore, in Section S1.1, we first demonstrate how to identify partial state sequences that *occur* in attractors or *occur* in larger partial state sequences.

This supporting text is a more formal description / proof of the procedures given in the main manuscript. The procedures in the main manuscript are revisited here in the following sections.

**Procedure 1:** Corresponds to Procedure S1.3 and Theorem S1.4 in Section S1.1.1

**Procedure 2:** Corresponds to Procedure S1.9 and Theorem S1.10 in Section S1.1.3

**Procedure 3:** Corresponds to Procedure S1.13 and Theorem S1.14 in Section S1.2.1

**Procedure 4:** Corresponds to Procedure S1.16 and Theorem S1.17 in Section S1.2.2

**Procedure 5:** Corresponds to Procedure S1.18 and Theorem S1.19 in Section S1.3

One thing to note first, is that if a partial state sequence  $P = \{\mathbf{x}_0^N, \mathbf{x}_1^N, \dots, \mathbf{x}_{q-1}^N\}$  occurs in an attractor  $A$ , so will  $q - 1$  other *equivalent* partial state sequences  $P' = \{\mathbf{y}_0^N, \mathbf{y}_1^N, \dots, \mathbf{y}_{q-1}^N\}$  where the partial states in  $P$  have been rotated modulo  $q$ . This is since rotating the partial states in  $P$  (modulo  $q$ ) will leave a partial state sequence that still satisfies the 3 properties of Definition 3. The following Definition and Theorem formalise this.

**Definition S1.1.** A partial state sequences  $P_x = \{\mathbf{x}_0^N, \mathbf{x}_1^N, \dots, \mathbf{x}_{q-1}^N\}$  is *equivalent* to another partial state sequence  $P_w = \{\mathbf{w}_0^M, \mathbf{w}_1^M, \dots, \mathbf{w}_{r-1}^M\}$  if the following hold

1.  $M = N$
2.  $q = r$
3.  $\exists$  an integer  $c$  such that,  $\mathbf{x}_i^N = \mathbf{w}_j^M$ , for all  $i \in \{0, 1, \dots, q - 1\}$  and  $j = i + c \pmod{q}$

Whenever  $P_x$  is equivalent to  $P_w$ ,  $P_w$  is also equivalent to  $P_x$  (replace  $c$  by  $-c \pmod{q}$  in the above definition)

**Theorem S1.2.** Consider a partial state sequence  $P_x = \{\mathbf{x}_0^N, \dots, \mathbf{x}_{q-1}^N\}$  that occurs in an attractor  $A = \{\mathbf{z}_0, \dots, \mathbf{z}_{p-1}\}$

A partial state sequence  $P_w = \{\mathbf{w}_0^N, \dots, \mathbf{w}_{r-1}^N\}$  (for the same node set  $N$ ) occurs in  $A \iff P_w$  is equivalent to  $P_x$

**PROOF:** see Section S1.4.1

From now on, we primarily consider only one of the the  $q$  equivalent partial states sequences, since if one occurs in an attractor, so will the other  $q - 1$ .

## S1.1 Preliminary results and procedures

Given a node set  $N$  and attractor  $A = \{\mathbf{z}_0, \mathbf{z}_1, \dots, \mathbf{z}_{p-1}\}$ , Section S1.1.1 provides a procedure to identify a partial state sequence  $P = \{\mathbf{x}_0^N, \mathbf{x}_1^N, \dots, \mathbf{x}_{q-1}^N\}$  that occurs in  $A$  (i.e. the properties of Definition 3 are satisfied). Section S1.1.2 adapts this procedure to look for partial state sequences (for a node set  $N$ ) occurring in other partial state sequences (for a larger node set  $M \supset N$ ).

Section S1.1.3 then extends these ideas to sets of attractors  $\mathbb{C}$ , to identify partial state sequences  $P_1, \dots, P_k$  (for a node set  $N$ ) that partition  $\mathbb{C}$  into distinguishable groups.

### S1.1.1 Partial state sequences occurring in an attractor $A$

Given a node set  $N$  and an attractor  $A = \{\mathbf{z}_0, \mathbf{z}_1, \dots, \mathbf{z}_{p-1}\}$ , the following procedure identifies a partial state sequence  $P = \{\mathbf{x}_0^N, \dots, \mathbf{x}_{q-1}^N\}$  that occurs in  $A$  (i.e. the 3 properties of Definition 3 of the main text are satisfied)

#### Procedure S1.3. (Procedure 1 from main manuscript)

Initially let  $k = 0$ ,  $b_0 = 0$  and  $\mathbf{x}_0^N = \{s_i \in \mathbf{z}_0 : n_i \in N\}$ . Then enter the following loop

##### Step 1

If  $k = p - 1$ , let  $q^* = b_{p-1} + 1$  and **go to** step 6

##### Step 2

Let  $j = k$  and increment  $k$  by 1 (let  $k = k + 1$ )

##### Step 3

If  $\mathbf{x}_{b_j}^N = \{s_i \in \mathbf{z}_k : n_i \in N\}$ , then let  $b_k = b_j$  and **go to** step 1 (otherwise **go to** step 4)

##### Step 4

Let  $b_k = b_j + 1$

##### Step 5

Let  $\mathbf{x}_{b_k}^N = \{s_i \in \mathbf{z}_k : n_i \in N\}$  and **go to** step 1

##### Step 6

If  $\mathbf{x}_{b_{p-1}}^N = \mathbf{x}_{b_0}^N$  and  $q^* > 1$ , reduce  $q^*$  by 1 (let  $q^* = q^* - 1$ )

### Step 7

Let  $q$  be the smallest integer for which both

- (a)  $q \mid q^*$  (this can be  $q = q^*$ )
- (b)  $\mathbf{x}_f^N = \mathbf{x}_g^N$ , whenever  $f \leq b_{p-1}$ ,  $g \leq b_{p-1}$  and  $f \pmod{q} = g \pmod{q}$

### Step 8

For  $k = 0, \dots, p-1$ , let  $b_k = b_k \pmod{q}$

At the end of this procedure  $P = \{\mathbf{x}_0^N, \dots, \mathbf{x}_{q-1}^N\}$  occurs in  $A$  and the 3 properties of Definition 3 are satisfied. Steps 2-5 ensure that properties 1 and 2 are satisfied and the partial states in  $P$  cycle within the attractor  $A$  in the correct order (as the attractor progresses over time). Steps 3, 6, 7 and 8 ensures property 3, so that  $P$  is smallest possible set of partial states that cycles within  $A$ . In particular (a) no two adjacent partial states in  $P$  are identical, (b) there are no redundant partial states in  $P$  and (c) if a sequence of states cycles many times within an attractor, only one copy is kept. This leaves a partial state sequence that just describes the 'order' in which the node states change in  $A$  (for nodes in  $N$ ).

We demonstrate this formally with Theorem S1.4 (below) which is proved at the end of this supporting text (Section S1.4.1). In **C**, **C1** and **C2** correspond to properties 1 and 2 of Definition 3. **C3**, **C4** and **C5** correspond to (a), (b) and (c) discussed above.

**Theorem S1.4.** Consider a node set  $N$ , partial state sequence  $P = \{\mathbf{x}_0^N, \dots, \mathbf{x}_{q-1}^N\}$  and attractor  $A = \{\mathbf{z}_0, \mathbf{z}_1, \dots, \mathbf{z}_{p-1}\}$ .

If any of one the following 3 statements (**A**, **B** or **C**) is true, they are all true. (i.e. **A**  $\iff$  **B**  $\iff$  **C**  $\iff$  **A**)

**A:**  $P$  occurs in  $A$

**B:** Given  $N$  and  $A$ , Procedure S1.3 identifies a partial state sequence  $P^*$  that is equivalent to  $P$  (this could be  $P^* = P$ )

**C:** The following are true for  $P = \{\mathbf{x}_0^N, \dots, \mathbf{x}_{q-1}^N\}$  and some sequence of integers  $b_0, \dots, b_{p-1} \in \{0, \dots, q-1\}$

1. For  $k = 0, \dots, p-1$ ,  $\mathbf{x}_{b_k}^N = \{s_i \in \mathbf{z}_k : n_i \in N\}$
2. For each  $k \in \{0, \dots, p-1\}$  and  $j = k-1 \pmod{p}$ , either  
(a)  $b_k = b_j$  or (b)  $b_k = b_j + 1 \pmod{q}$
3. Given  $k \in \{0, \dots, p-1\}$  and  $j = k-1 \pmod{p}$ , if  $b_k \neq b_j$  then  $\mathbf{x}_{b_k}^N \neq \mathbf{x}_{b_j}^N$
4. For each  $a \in \{0, \dots, q-1\}$ ,  $\exists k \in \{0, \dots, p-1\}$  such that  $b_k = a$
5. There is no integer  $q' \mid q$  ( $q' < q$ ) for which  $\mathbf{x}_f^N = \mathbf{x}_g^N$  whenever  $f, g$  satisfies  $f \pmod{q'} = g \pmod{q'}$

**PROOF:** See Section S1.4.1

### S1.1.2 Partial state sequences occurring in other partial state sequences

Definition 3 of the main text involves a partial state sequence  $P = \{\mathbf{x}_0^N, \mathbf{x}_1^N, \dots, \mathbf{x}_{q-1}^N\}$  occurring in an attractor  $A$ . However, it is possible to adapt this definition to look at a partial state sequence  $P_x$  (for a node set  $N$ ) occurring in another partial state sequence  $P_y$  (for a larger node set  $M \supseteq N$ ). i.e.

**Definition S1.5.** A partial state sequence  $P_x = \{\mathbf{x}_0^N, \mathbf{x}_1^N, \dots, \mathbf{x}_{q-1}^N\}$  occurs in another partial state sequence  $P_y = \{\mathbf{y}_0^M, \dots, \mathbf{y}_{r-1}^M\}$  (where  $M \supseteq N$ ) if there exists integers  $b_0, \dots, b_{r-1} \in \{0, \dots, q-1\}$  for which the following is true

1. For  $k = 0, \dots, r-1$ ,  $\mathbf{x}_{b_k}^N = \{s_i \in \mathbf{y}_k^M : n_i \in N\}$
2. For each  $k \in \{0, \dots, r-1\}$  and  $j = k-1 \pmod{r}$ , either  
 (a)  $b_k = b_j$  or (b)  $b_k = b_j + 1 \pmod{q}$
3. 1 and 2 are not true for any smaller partial state sequence  $P' = \{\mathbf{z}_0^N, \mathbf{z}_1^N, \dots, \mathbf{z}_{q'-1}^N\}$  and integers  $c_0, \dots, c_{r-1} \in \{0, \dots, q'-1\}$  ( $q' < q$ )

Given a node set  $N \subseteq M$  and a partial state sequence  $P_y = \{\mathbf{y}_0^M, \mathbf{y}_1^M, \dots, \mathbf{y}_{r-1}^M\}$ , Procedure S1.3 can be adapted to identify a partial state sequence  $P_x = \{\mathbf{x}_0^N, \mathbf{x}_1^N, \dots, \mathbf{x}_{q-1}^N\}$ , that occurs in  $P_y$ .

**Procedure S1.6.** Initially let  $k = 0$ ,  $b_0 = 0$  and  $\mathbf{x}_0^N = \{s_i \in \mathbf{y}_0^M : n_i \in N\}$ . Then enter the following loop.

Then enter the same loop as Procedure S1.3, except replace  $p$  with  $r$  (in Step 1) and replace  $\mathbf{z}_k$  with  $\mathbf{y}_k^M$  (in Steps 3 and 5)

Theorems S1.2 and S1.4 can also be adapted and proved in an analogous manner, replacing  $p$  with  $r$  and replacing  $A = \{\mathbf{z}_0, \dots, \mathbf{z}_{p-1}\}$  with  $P_y = \{\mathbf{y}_0^M, \dots, \mathbf{y}_{r-1}^M\}$

**Theorem S1.7.** Consider a partial state sequence  $P_x = \{\mathbf{x}_0^N, \dots, \mathbf{x}_{q-1}^N\}$  that occurs in another partial state sequence  $P_y = \{\mathbf{y}_0^M, \dots, \mathbf{y}_{r-1}^M\}$  ( $M \supset N$ )

A partial state sequence  $P_w = \{\mathbf{w}_0^N, \dots, \mathbf{w}_{r-1}^N\}$  (for the same node set  $N$ ) occurs in  $P_y \iff P_w$  is equivalent to  $P_x$

**PROOF:** Analogous to the proof of S1.2

**Theorem S1.8.** Consider a node set  $N$  and two partial state sequence  $P_x = \{\mathbf{x}_0^N, \dots, \mathbf{x}_{q-1}^N\}$  and attractor  $P_y = \{\mathbf{y}_0^M, \dots, \mathbf{y}_{r-1}^M\}$  ( $M \supset N$ )

$P_x$  occurs in  $P_y$

$\iff$

Given  $N$  and  $P_y$ , Procedure S1.6 identifies a partial state sequence  $P^*$  that is equivalent to  $P_x$  (this could be  $P^* = P_x$ )

**PROOF:** Analogous to the proof of S1.4

### S1.1.3 Partial state sequences partitioning a set of attractors $\mathbb{C}$

Given a node set  $N$  and a set of attractors  $\mathbb{C}$ , we want to find a set of partial state sequences  $P_1, \dots, P_k$  that are all distinguishable from one another and optimally partition  $\mathbb{C}$  into smaller sets  $\mathbb{C}_1, \dots, \mathbb{C}_k$ .

One such way is to apply the following procedure (Procedure S1.9). This will identify partial state sequences  $P_1, \dots, P_k$  and sets of attractors  $\mathbb{C}_1, \dots, \mathbb{C}_k$  that satisfy properties **A- F** in Theorem S1.10

#### Procedure S1.9. (Procedure 2 from main manuscript)

Begin with the node set  $N$  and set of attractors  $\mathbb{C}$  and then carry out the following steps

##### Step 1

For every attractor  $A_j \in \mathbb{C}$ , apply Procedure S1.3 to  $N$  and  $A_j$ , to get a partial state sequence  $Q_j$  that occurs in  $A_j$ .

##### Step 2

Put the  $Q_j$ 's into groups  $i = 1, \dots, k$ , whereby two partial state sequences  $Q'_x, Q'_y$  go in the same group  $\iff Q'_x$  is equivalent to  $Q'_y$ .

(here  $k$  is the minimum number of groups required to hold every  $Q_j$ )

##### Step 3

For each group,  $i$ , let

- i)  $P_i = \text{any } Q_j \text{ in the group } i$
- ii)  $\mathbb{C}_i = \{A_j : Q_j \text{ is part of the group } i\}$

**Theorem S1.10.** Given a node set  $N$  and set of attractors  $\mathbb{C}$ , Procedure S1.9 identifies partial state sequences  $P_1, \dots, P_k$  and sets of attractors  $\mathbb{C}_1, \dots, \mathbb{C}_k$  satisfying

**A:** For  $i = 1, \dots, k$ ,  $P_i$  involves the node set  $N$  (i.e.  $P_i = \{\mathbf{x}_{i_0}^N, \dots, \mathbf{x}_{i_{q-1}}^N\}$ )

**B:** For  $i = 1, \dots, k$ ,  $P_i$  occurs in every attractor  $A \in \mathbb{C}_i$

**C:** For  $i = 1, \dots, k$ ,  $P_i$  does not occur in any attractor  $A \notin \mathbb{C}_i$

**D:** For any  $i, j$  ( $1 \leq i < j \leq k$ ),  $\mathbb{C}_i \cap \mathbb{C}_j = \emptyset$

**E:**  $\mathbb{C}_1 \cup \dots \cup \mathbb{C}_k = \mathbb{C}$

**F:** Given the node set  $N$ , there are no other partial state sequences  $P' \notin \{P_1, \dots, P_k\}$  that occur in any attractor  $A \in \mathbb{C}$  (unless  $P'$  is equivalent to some  $P_i \in \{P_1, \dots, P_k\}$ )

**PROOF** See Section S1.4.1

The following results (Lemmas S1.11 and S1.12, below), demonstrate that when a partial state sequence  $P_x$  (for a node set  $N$ ) is extended with extra nodes, the new partial state sequence  $P_y$  (for a node set  $M \supset N$ ) can only occur in a smaller subset of attractors.

**Lemma S1.11.** Consider two partial state sequences  $P_x = \{\mathbf{x}_0^N, \dots, \mathbf{x}_{q-1}^N\}$  and  $P_y = \{\mathbf{y}_0^M, \dots, \mathbf{y}_{r-1}^M\}$  (where  $M \supseteq N$ )

Then,

- (a)  $P_x$  occurs in  $P_y$ , and  $P_y$  occurs in an attractor  $A \implies P_x$  occurs in  $A$
- (b)  $P_x$  and  $P_y$  both occur in an attractor  $A \implies P_x$  occurs in  $P_y$

**PROOF:** See Section S1.4.1

**Lemma S1.12.** Consider two partial state sequences  $P_x = \{\mathbf{x}_0^N, \dots, \mathbf{x}_{q-1}^N\}$  and  $P_y = \{\mathbf{y}_0^M, \dots, \mathbf{y}_{r-1}^M\}$ , and two sets of attractors  $\mathbb{C}_x$  and  $\mathbb{C}_y$  for which

1.  $M \supseteq N$
2.  $P_x$  occurs in every attractor  $A \in \mathbb{C}_x$
3.  $P_x$  does not occur in any attractor  $A \notin \mathbb{C}_x$
4.  $P_y$  occurs in every attractor  $A \in \mathbb{C}_y$
5.  $P_y$  does not occur in any attractor  $A \notin \mathbb{C}_y$

Then, either

- (a)  $\mathbb{C}_x \cap \mathbb{C}_y = \emptyset$
- (b)  $P_x$  occurs in  $P_y$  and  $\mathbb{C}_y \subseteq \mathbb{C}_x$

**PROOF:** See Section S1.4.1

## S1.2 Stage 1: Identifying every partition sequence

In this stage, we first identify every partial every partial state sequence that satisfies Definition 4 of the main text (*intersection sequences*). These are then used to identify every *partition sequence* satisfying Definition 5 of the main text. Therefore, we describe the two procedures separately (in Sections S1.2.1 and S1.2.2 below)

### S1.2.1 Definition 4: Intersection sequences

Identifying every intersection sequence is equivalent to finding every partial state sequence that satisfies the 3 properties of Definition 4 (for some set of attractors  $\mathbb{C}$ , say). I first give a procedure for identifying every intersection sequence, and then discuss ways to make the process more efficient.

### Procedure S1.13. (Procedure 3 from main manuscript)

First, consider the tree in Fig.S1.1 and note that for every node set  $N$ , there exists a path from left to right (starting at  $'-'$ ) that corresponds to it. Therefore, searching through a tree analogous to the one in Fig.S1.1 (for a network with nodes  $V = \{n_1, \dots, n_v\}$ ), every node set  $N$  can be visited at some point.

The procedure searches through the tree (as in Fig.S1.1) and carries out the following steps for each node set  $N$ . At the end of the procedure the set  $\mathbf{S}$  contains every intersection sequence

#### Step 0 : Initialise

Let  $\mathbf{S} = \emptyset$  and let  $N = \emptyset (-)$

#### Step 1 :

Move onto the next node set  $N$  in the tree (as in Fig.S1.1).

#### Step 2 :

For the node set  $N$ , apply Procedure S1.9 to identify partial state sequences  $P_1, \dots, P_k$  and sets of attractors  $\mathbb{C}_1, \dots, \mathbb{C}_k$  satisfying (from Theorem S1.10)

- (a) For  $i = 1, \dots, k$ ,  $P_i$  involves the node set  $N$  (i.e.  $P_i = \{\mathbf{x}_{i_0}^N, \dots, \mathbf{x}_{i_{q-1}}^N\}$ )
- (b) For  $i = 1, \dots, k$ ,  $P_i$  occurs in every attractor  $A \in \mathbb{C}_i$
- (c) For  $i = 1, \dots, k$ ,  $P_i$  does not occur in any attractor  $A \notin \mathbb{C}_i$
- (d) For any  $i, j$  ( $1 \leq i < j \leq k$ ),  $\mathbb{C}_i \cap \mathbb{C}_j = \emptyset$
- (e)  $\mathbb{C}_1 \cup \dots \cup \mathbb{C}_k = \mathbb{A}$  (the set of all attractors)
- (f) Given the node set  $N$ , there are no other partial state sequences  $P' \notin \{P_1, \dots, P_k\}$  that occur in any attractor  $A \in \mathbb{A}$  (unless  $P'$  is equivalent to some  $P_i \in \{P_1, \dots, P_k\}$ )

#### Step 3 :

For  $i = 1, \dots, k$ , add the pair  $\{P_i, \mathbb{C}_i\}$  to the set  $\mathbf{S}$

#### Step 4 :

For  $i = 1, \dots, k$ , check  $\mathbf{S}$  to see if there is any pair  $\{Q = \{\mathbf{y}_0^M, \dots, \mathbf{y}_{r-1}^M\}, \mathbb{D}\}$  for which either of the following are true

- (a)  $M \subset N$  and  $\mathbb{D} = \mathbb{C}_i$
- (b)  $M \supset N$  and  $\mathbb{D} = \mathbb{C}_i$

If (a) is true, remove  $\{Q, \mathbb{D}\}$  from  $\mathbf{S}$ . If (b) is true, remove  $\{P_i, \mathbb{C}_i\}$  from  $\mathbf{S}$

#### Step 5 :

If the tree has been completely searched, **end procedure**. Otherwise, return to step 1.

At the end of the procedure,  $\mathbf{S}$  gives a complete set of intersection sequences (satisfying the 3 properties of Definition 4). Step 2 ensures every partial state sequence that satisfies properties 1 and 2 are identified for each node set  $N$ . Step 4 then ensures that only those satisfying Step 3 remain in  $\mathbf{S}$ . We demonstrate this formally with Theorem S1.14 (below), which is proved in Section S1.4.2

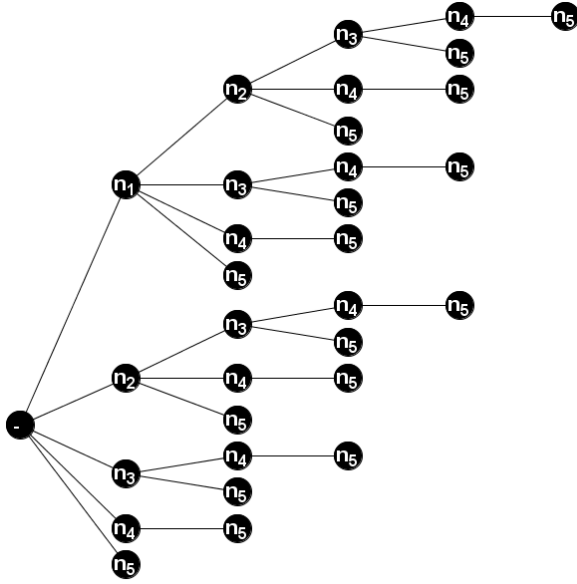

Figure S1.1: Every path from left to right (starting at 'l') in this tree represents a different node set  $N \subseteq V = \{n_1, n_2, n_3, n_4, n_5\}$ . It is possible to search this tree and visit every node set  $N \subseteq V$  (exactly once). For example, follow the path  $\{n_1\} \rightarrow \{n_1, n_2\} \rightarrow \{n_1, n_2, n_3\} \rightarrow \{n_1, n_2, n_3, n_4\} \rightarrow \{n_1, n_2, n_3, n_4, n_5\} \rightarrow \{n_1, n_2, n_3, n_5\} \rightarrow \{n_1, n_2, n_4\} \rightarrow \{n_1, n_2, n_4, n_5\} \rightarrow \{n_1, n_2, n_5\} \rightarrow \{n_1, n_3\} \rightarrow \{n_1, n_3, n_4\} \rightarrow \{n_1, n_3, n_4, n_5\} \rightarrow \{n_1, n_3, n_5\} \rightarrow \{n_1, n_4\} \rightarrow \{n_1, n_4, n_5\} \rightarrow \{n_1, n_5\} \rightarrow \{n_2\} \rightarrow \{n_2, n_3\} \rightarrow \{n_2, n_3, n_4\} \rightarrow \{n_2, n_3, n_4, n_5\} \rightarrow \{n_2, n_3, n_5\} \rightarrow \{n_2, n_4\} \rightarrow \{n_2, n_4, n_5\} \rightarrow \{n_2, n_5\} \rightarrow \{n_3\} \rightarrow \{n_3, n_4\} \rightarrow \{n_3, n_4, n_5\} \rightarrow \{n_3, n_5\} \rightarrow \{n_4\} \rightarrow \{n_4, n_5\} \rightarrow \{n_5\}$

**Theorem S1.14.** At the end of Procedure S1.13, the following is true

$P$  is an intersection sequence

$\iff$

$P$  is equivalent to a partial state sequence  $P^* \in \{P^*, \mathbb{C}\} \in \mathbf{S}$

**PROOF:** See Section S1.4.2

We now explain how the the procedure can be made more efficient.

### Improving efficiency(1)

In step 2, partial state sequences  $P_1, \dots, P_k$  and sets of attractors  $\mathbb{C}_1, \dots, \mathbb{C}_k$  are identified that satisfy (a) to (f) (given a node set  $N$ ). Now, because of the following Theorem (Theorem S1.15),

**If, for a node set  $N$ :**  $\mathbb{C}_x \in \mathbb{C}_1, \dots, \mathbb{C}_k$  is a single attractor after Step 2 (i.e.  $\mathbb{C}_x = \{A_x\}$ )

**Then, for any node set  $M \supset N$ :** Step 2 returns the same single attractor  $\mathbb{C}_x = \{A_x\}$

This implies that this attractor ( $A_x$ ) need not be re-analysed during the analysis of any node set  $M \supset N$ . However, because of part (b) of the Theorem, the full node set  $V = \{n_1, \dots, n_v\}$  should still be fully analysed in Steps 2 - 4 (possibly at the very end of the procedure).



**Theorem S1.15.** Consider a partial state sequence  $P = \{\mathbf{x}_0^N, \dots, \mathbf{x}_{q-1}^N\}$  for which

1.  $P$  occurs in a single attractor  $A$
2.  $P$  does not occur in any attractor  $A' \neq A$

Then, given that  $V$  is the set of all nodes,

- (a) Given a node set  $M$  satisfying  $N \subset M \subset V$ , it is impossible to find an intersection sequence that involves the node set  $M$  and occurs in  $A$ .
- (b) Given the node set  $V$ , it is possible to find an intersection sequence  $P'$  that involves the node set  $V$  and occurs in  $A$  (usually  $A$  itself).

**PROOF:** See Section S1.4.2

We show one way in which this knowledge can improve efficiency in Procedure S1.13. Suppose, attractors  $A'_1, \dots, A'_f$  were returned as single attractors in Step 2, when analysing earlier node sets  $P \subseteq N$  (including  $P = N$ ). Then, when a path is extended to the right in the tree (Fig.S1.1) from a node set  $N$  to a node set  $M \supset N$ , Procedure S1.9 in Step 2 need only be applied to the set of attractors

$$\mathbb{A}' = \mathbb{A} \setminus \{A'_1, \dots, A'_f\}$$

Moreover, if **every** attractor is returned as a single attractor in Step 2, when analysing earlier node sets  $P \subseteq N$  (including  $P = N$ ), there is no need to extend the path to look at node sets  $M \supset N$ . In Fig.S1.1, this is equivalent to ignoring all longer paths that include extra nodes to the right. For example, if  $N = \{n_1, n_3\}$ , there would be no need to look at longer paths (from left to right) that give node sets  $M = \{n_1, n_3, n_4\}$ ,  $M = \{n_1, n_3, n_5\}$  or  $M = \{n_1, n_3, n_4, n_5\}$

### Improving efficiency(2)

As can be seen in Fig.S1.1, some nodes appear less than others, with the least frequent nodes visited earlier in the tree. Therefore, it is likely to be advantageous to re-index nodes in the tree during the search. At any stage during the search, nodes along paths to the right (from a node set  $N$ ) can be re-indexed without impairing our ability to search the tree. For example, once  $N = \{n_1, n_3\}$  has been reached, re-indexing nodes  $\{n_4, n_5\}$  to  $\{n_5, n_4\}$  still allows us to reach the same node sets  $M = \{n_1, n_3, n_4\}$ ,  $M = \{n_1, n_3, n_5\}$  and  $M = \{n_1, n_3, n_4, n_5\}$ , as before. However, they would be visited in a different order ( $M = \{n_1, n_3, n_5\}$  then  $M = \{n_1, n_3, n_4\}$  then  $M = \{n_1, n_3, n_4, n_5\}$ ).

Once a node set  $N$  has been analysed, re-indexing so that the next node  $n_j$  to be visited maximises  $c$  (below) will speed up the search

- For the sets of attractors  $\mathbb{C}_1, \dots, \mathbb{C}_k$  identified in Step 2 (for the new node set  $M = N \cup \{n_j\}$ ),  $\mathbb{C}_i = \{A_i\}$  is a single attractor for  $c$  ( $\leq k$ ) different values of  $i$

Although this involves carrying out Step 2 multiple times (to compare different  $n_j$ 's), selecting an  $n_j$  that gives lots of single attractor  $\mathbb{C}_i$ 's will mean less analysis later on (as discussed above).

The quicker we can reach a stage where every set  $\mathbb{C}_i$  in Step 2 is a single attractor, the more of the tree can be ignored during the search.

### S1.2.2 Definition 5: Partition sequences

In order to find every partition sequence satisfying Definition 5, it is necessary to find every partial state sequence  $P = \{\mathbf{x}_0^N, \mathbf{x}_1^N, \dots, \mathbf{x}_{q-1}^N\}$  that satisfies any of the following properties (**A**, **B** or **C**), for some set of attractors  $\mathbb{C}$

#### **A : $P$ is Core to $\mathbb{C}$**

The following 3 properties hold for  $P$

1.  $P$  occurs in an intersection sequence  $P'$ , which intersects at  $\mathbb{C}$  ( $P$  can equal  $P'$ ).
2. If an intersection sequence  $Q$  (for a node set  $M$ ) intersects at  $\mathbb{D}$  (where  $\mathbb{D} \cap \mathbb{C} \neq \emptyset$ ), then there exists an intersection sequence  $Q'$  (for a node set  $M' \supseteq M \cup N$ ) that occurs in every attractor  $A \in \mathbb{D} \cap \mathbb{C}$
3. 1 and 2 are not true for any larger partial state sequence  $P''$  (for a node set  $N'' \supset N$ )

#### **B : $P$ is Exclusive to $\mathbb{C}$**

$P$  is the only intersection sequence that intersects at  $\mathbb{C}$   
(excluding those partial state sequences that are equivalent to  $P$ )

#### **C : $P$ is Independently Oscillating**

$P$  intersects at  $\mathbb{C}$  and cycles out of phase with another intersection sequence  $Q$ . i.e.  $\exists Q$  that involves the node set  $M$  and intersects at  $\mathbb{D}$ , for which

1.  $|\mathbb{C} \cap \mathbb{D}| \geq 2$
2.  $N \cup M = V$  (the set of all nodes)

Using the complete list of intersection sequences (see above)), these can be found as follows

### **Part A: Core components**

From Procedure S1.13, we get a set  $\mathbf{S}$  that contains the complete set of intersection sequences, along with the set of attractors each one intersects at (if  $\{P', \mathbb{C}\} \in \mathbf{S}$ , then  $P'$  intersects at  $\mathbb{C}$ ).

Using this set  $\mathbf{S}$  as an input, the following procedure identifies every partial state sequence that is core to some set of attractors (i.e every partial state sequence  $P$  satisfying Definition 5A)

**Procedure S1.16. (Procedure 4 from main manuscript)**

Initially, let the set  $\mathbf{T} = \emptyset$  (empty set). Then, for every intersection sequence  $P' = \{\mathbf{y}_0^{N'}, \mathbf{y}_1^{N'}, \dots, \mathbf{y}_{r-1}^{N'}\} \in \{P', \mathbb{C}\} \in \mathbf{S}$ , carry out the following steps

**Step 1:**

From the complete set of intersection sequences ( $\mathbf{S}$ ), identify every  $Q_i$  (for the node set  $M_i$ ) for which

- (a)  $Q_i$  intersects at  $\mathbb{D}_i$ , where  $\mathbb{D}_i \cap \mathbb{C} \neq \emptyset$
- (b) There is no intersection sequence  $Q^*$  (for a larger node set  $M^* \supset M_i$ ) that intersects at  $\mathbb{D}^* \supseteq \mathbb{D}_i \cap \mathbb{C}$

**Step 2:**

Let  $k$  be the number of partial state sequences from Step 1

**Step 3:**

Let  $N = M_1 \cap \dots \cap M_k$  ( $N \subseteq N'$  since  $P'$  is itself identified in Step 1)

**Step 4:**

If  $N = \emptyset$  in Step 3, apply Procedure S1.6 to find a partial state sequence  $P = \{\mathbf{x}_0^N, \mathbf{x}_1^N, \dots, \mathbf{x}_{q-1}^N\}$  that occurs in  $P'$ .

**Step 5:**

If  $N = \emptyset$  in Step 3, add the pair  $\{P, \mathbb{C}\}$  to the set  $\mathbf{T}$

At the end of the procedure,  $\mathbf{T}$  contains every partial state sequence  $P$  that is core to some set of attractors  $\mathbb{C}$  (i.e every partial state sequence  $P$  satisfying Definition 5A). Essentially, in each loop,  $N$  is the set of nodes that is core to every intersection sequence that occurs in any attractor  $A \in \mathbb{C}$ . We demonstrate this formally with Theorem S1.17 (below), which is proved in Section S1.4.2

**Theorem S1.17.** At the end of Procedure S1.16, the following is true

$P$  that is core to some set of attractors  $\mathbb{C}$  (Definition 5A is satisfied)

$\iff$

$P$  is equivalent to a partial state sequence  $P^* \in \{P^*, \mathbb{C}\} \in \mathbf{T}$

**PROOF:** See Section S1.4.2

**Part B: Exclusive**

This is simply done by searching through all intersection sequences (in  $\mathbf{S}$ ) and identifying those that satisfy Definition 5B.

**Part C: Independently Oscillating**

This is simply done by searching through every pair of intersection sequences (in  $\mathbf{S}$ ) to see which pairs satisfy Definition 5C. Where such a pair is found, both of them are partition sequences.

## S1.3 Stage 2: Subsystems

Using all the partition sequences from Stage 1 as an input (i.e those partial state sequences identified in A,B and C of Section S1.2.2), the following procedure identifies every subsystem (satisfying Definition 6 of the main text)

### Procedure S1.18. (Procedure 5 from main manuscript)

Initially, let the set  $\mathbf{U} = \emptyset$  (empty set)

Then, for every partition sequence  $P = \{\mathbf{y}_0^M, \mathbf{y}_1^M, \dots, \mathbf{y}_{r-1}^M\}$  (identified in **A**, **B** or **C** of Section S1.2.2), carry out the following steps

#### Step 1:

From the complete set of partition sequences, identify every partition sequence  $P_i$  (for a node set  $M_i$ ) for which

(a)  $M_i \subset M$

(b)  $P_i$  and  $P$  both occur in some attractor  $A$

(Here, (a), (b) and Lemma S1.11 imply that  $P_i$  occurs in  $P$ )

#### Step 2:

Let  $k$  be the number of partition sequences from Step 1

#### Step 3:

Let  $N = M \setminus (M_1 \cup \dots \cup M_k)$

#### Step 4:

If  $N \neq \emptyset$ , use Procedure S1.6 to identify  $S = \{\mathbf{x}_0^N, \mathbf{x}_1^N, \dots, \mathbf{x}_{q-1}^N\}$  that occurs in  $P$

#### Step 5:

If  $N \neq \emptyset$ , add  $S$  (identified in Step 4) to the set  $\mathbf{U}$

At the end of the procedure,  $\mathbf{U}$  contains every subsystem  $P$  satisfying the 3 properties of Definition 6. Essentially, property 1 is satisfied because of Step 4. Property 2 is satisfied because of Step 1 and the choice of  $N$  in step 3. Property 3 is satisfied because  $N$  is the largest set for which  $M_i \cap N = \emptyset$  for all  $i = 1, \dots, k$ . We demonstrate this formally with Theorem S1.19 (below), which is proved in Section S1.4.3

**Theorem S1.19.** Assume Procedure S1.18 begins with every partition sequence. Then, at the end of Procedure S1.18, the following is true

$S$  is a subsystem (Definition 6 is satisfied)

$\iff$

$S$  is equivalent to a partial state sequence  $S^* \in \mathbf{U}$

**PROOF:** See Section S1.4.3

The following Theorem demonstrates that the set of all subsystems gives a complete coverage of the attractors

**Theorem S1.20.** Given an attractor  $A$  and node  $n_i$ , there exists a subsystem  $S = \{\mathbf{x}_0^N, \mathbf{x}_1^N, \dots, \mathbf{x}_{q-1}^N\}$  for which

- (a)  $n_i \in N$
- (b)  $S$  occurs in  $A$

**PROOF :** See Section S1.4.3

## S1.4 Proofs for earlier results

For the Theorems and Lemmas in Section S1.1, Section S1.2 and Section S1.3, the proofs are given (in Sections S1.4.1, S1.4.2 and S1.4.3 respectively).

Some of these proofs refer to Lemmas S1.21 - S1.25. These can be found in Section S1.4.4.

### S1.4.1 Proofs for Section S1.1

#### Theorem. S1.2

Consider a partial state sequence  $P_x = \{\mathbf{x}_0^N, \dots, \mathbf{x}_{q-1}^N\}$  that occurs in an attractor  $A = \{\mathbf{z}_0, \dots, \mathbf{z}_{p-1}\}$

A partial state sequence  $P_w = \{\mathbf{w}_0^N, \dots, \mathbf{w}_{r-1}^N\}$  (for the same node set  $N$ ) occurs in  $A \iff P_w$  is equivalent to  $P_x$

**PROOF:**

*Case:  $\implies$ :*

We assume  $P_x = \{\mathbf{x}_0^N, \dots, \mathbf{x}_{q-1}^N\}$  and  $P_w = \{\mathbf{w}_0^N, \dots, \mathbf{w}_{r-1}^N\}$  both occur in  $A$ . Therefore, by Definition 3 (main text), it is impossible to find a partial state sequence  $P'$  (for the same node set  $N$ ) that satisfies properties 1 and 2 and has less partial states ( $q' < q$ ).

Therefore, since  $P_x$  and  $P_w$  both involve the same node set  $N$  and both satisfy properties 1 and 2 of Definition 3, they must contain the same number of partial states. i.e.

**A:**  $q = r$

Since  $P_x$  and  $P_w$  both occur in  $A$ , Lemmas S1.21 and S1.23 (in Section S1.4.4) and **A** imply that there exists integers  $l$  and  $m$  for which

**B:** For every  $i \geq 0$ ,  $\mathbf{x}_{l+i \pmod q}^N = \mathbf{w}_{m+i \pmod r}^N$

To show that  $P_x$  is equivalent to  $P_w$ , I need to show that the 3 properties of Definition S1.1 are satisfied. Property 1 is obvious because  $P_x$  and  $P_w$  involve the same node set  $N$ . Property 2 is satisfied because of **A**. Property 3 is satisfied because of the following.

Let  $c = m - l \pmod{q}$ .

Then for all  $u = \{0, 1, \dots, q - 1\}$  and  $i = q - l + u$ , **B** implies

$$- \mathbf{x}_u^N = \mathbf{x}_{l+i-q}^N = \mathbf{w}_{m+i-q}^M \pmod{q} = \mathbf{w}_{m-l+u}^M \pmod{q} = \mathbf{w}_{u+c}^M \pmod{q} = \mathbf{w}_v^M$$

(where  $v = u + c \pmod{q}$ )

Therefore  $P_x$  is equivalent to  $P_w$

*Case:  $\Leftarrow$ :*

We assume that  $P_x = \{\mathbf{x}_0^N, \dots, \mathbf{x}_{q-1}^N\}$  occurs in  $A = \{\mathbf{z}_0, \dots, \mathbf{z}_{p-1}\}$ , and that  $P_w = \{\mathbf{w}_0^N, \dots, \mathbf{w}_{r-1}^N\}$  is equivalent to  $P_x = \{\mathbf{x}_0^N, \dots, \mathbf{x}_{q-1}^N\}$ .

From Definition 3 of the main text,

**C:** The following are true for  $P_x = \{\mathbf{x}_0^N, \dots, \mathbf{x}_{q-1}^N\}$  and some sequence of integers  $b_0, \dots, b_{p-1} \in \{0, \dots, q - 1\}$

1. For  $k = 0, \dots, p - 1$ ,  $\mathbf{x}_{b_k}^N = \{s_i \in \mathbf{z}_k : n_i \in N\}$
2. For each  $k \in \{0, \dots, p - 1\}$  and  $j = k - 1 \pmod{p}$ , either  
**(a)**  $b_k = b_j$  or **(b)**  $b_k = b_j + 1 \pmod{q}$
3. 1 and 2 are not true for any smaller partial state sequence  $P' = \{\mathbf{y}_0^N, \mathbf{y}_1^N, \dots, \mathbf{y}_{q'-1}^N\}$  and integers  $d_0, \dots, d_{p-1} \in \{0, \dots, q' - 1\}$  ( $q' < q$ )

From Definition S1.1,  $q = r$  and there exists an integer  $c$  such that

**D:**  $\mathbf{x}_i^N = \mathbf{w}_j^N$ , for all  $i \in \{0, 1, \dots, q - 1\}$  and  $j = i + c \pmod{q}$

We want to show that  $P_w$  occurs in  $A$  (i.e. the 3 properties of Definition 3 are satisfied)

Letting  $c_k = b_k + c \pmod{q}$ , for  $k = 0, \dots, p - 1$ , **C** and **D** imply

1. For  $k = 0, \dots, p - 1$ ,  $\mathbf{w}_{c_k}^N = \mathbf{w}_{b_k+c}^N \pmod{q} \mathbf{x}_{b_k}^N = \{s_i \in \mathbf{z}_k : n_i \in N\}$
2. For each  $k \in \{0, \dots, p - 1\}$  and  $j = k - 1 \pmod{p}$ , either  
**(a)**  $c_k = b_k + c \pmod{q} = b_j + c \pmod{q} = c_j$   
**(b)**  $c_k = b_k + c \pmod{q} = b_j + 1 + c \pmod{q} = c_j + 1 \pmod{q}$

Therefore, properties 1 and 2 of Definition 3 are satisfied (from 1 and 2 above). Property 3 is satisfied because  $P_w$  and  $P_x$  have the same number of partial states ( $q = r$ ). Therefore, if property 3 failed for  $P_w$ , it would also fail for  $P_x$  (which is impossible since  $P_x$  occurs in  $A$ )

□

**Theorem. S1.4**

Consider a node set  $N$ , partial state sequence  $P = \{\mathbf{x}_0^N, \dots, \mathbf{x}_{q-1}^N\}$  and attractor  $A = \{\mathbf{z}_0, \mathbf{z}_1, \dots, \mathbf{z}_{p-1}\}$ .

If any of one the following 3 statements (**A**, **B** or **C**) is true, they are all true. (i.e.  $\mathbf{A} \iff \mathbf{B} \iff \mathbf{C} \iff \mathbf{A}$ )

**A:**  $P$  occurs in  $A$

**B:** Given  $N$  and  $A$ , Procedure S1.3 identifies a partial state sequence  $P^*$  that is equivalent to  $P$  (this could be  $P^* = P$ )

**C:** The following are true for  $P = \{\mathbf{x}_0^N, \dots, \mathbf{x}_{q-1}^N\}$  and some sequence of integers  $b_0, \dots, b_{p-1} \in \{0, \dots, q-1\}$

1. For  $k = 0, \dots, p-1$ ,  $\mathbf{x}_{b_k}^N = \{s_i \in \mathbf{z}_k : n_i \in N\}$
2. For each  $k \in \{0, \dots, p-1\}$  and  $j = k-1 \pmod{p}$ , either  
(a)  $b_k = b_j$  or (b)  $b_k = b_j + 1 \pmod{q}$
3. Given  $k \in \{0, \dots, p-1\}$  and  $j = k-1 \pmod{p}$ , **if**  $b_k \neq b_j$  **then**  $\mathbf{x}_{b_k}^N \neq \mathbf{x}_{b_j}^N$
4. For each  $a \in \{0, \dots, q-1\}$ ,  $\exists k \in \{0, \dots, p-1\}$  such that  $b_k = a$
5. There is no integer  $q' \mid q$  ( $q' < q$ ) for which  $\mathbf{x}_f^N = \mathbf{x}_g^N$  whenever  $f, g$  satisfies  $f \pmod{q'} = g \pmod{q'}$

**PROOF**

Here, it is sufficient to prove the following 3 cases:  $\mathbf{C} \implies \mathbf{A}$  and  $\mathbf{A} \implies \mathbf{B}$  and  $\mathbf{B} \implies \mathbf{C}$

**Case:  $\mathbf{C} \implies \mathbf{A}$**

This follows from Lemma S1.23 (in Section S1.4.4).

**Case:  $\mathbf{A} \implies \mathbf{B}$**

Suppose  $P$  occurs in  $A$ .

Given  $N$  and  $A$ , Procedure S1.3 identifies a partial state sequence  $P^* = P^* = \{\mathbf{w}_0^N, \dots, \mathbf{w}_{r-1}^N\}$

Therefore, by Lemmas S1.23 and S1.25 (in Section S1.4.4),  $P^*$  also occurs in  $A$ .

Therefore, by Theorem S1.2,  $P^*$  is equivalent to  $P$  (since they both involve the same node set  $N$  and occur in the same attractor  $A$ )

**Case:  $\mathbf{B} \implies \mathbf{C}$**

Applying Procedure S1.3 to  $N$  and  $A = \{\mathbf{z}_0, \mathbf{z}_1, \dots, \mathbf{z}_{p-1}\}$ , gives a partial state sequence  $P^* = \{\mathbf{w}_0^N, \dots, \mathbf{w}_{r-1}^N\}$ . Then since  $P^*$  is equivalent to  $P = \{\mathbf{x}_0^N, \dots, \mathbf{x}_{q-1}^N\}$

**D:**  $q = r$

**E:**  $\exists$  an integer  $d$  such that,  $\mathbf{x}_i^N = \mathbf{w}_j^N$ , for all  $i \in \{0, 1, \dots, q-1\}$  and  $j = i + d \pmod{q}$

Now by Lemma S1.25 (in Section S1.4.4),

**F**: The following are true for  $P^* = \{\mathbf{w}_0^N, \dots, \mathbf{w}_{q-1}^N\}$  and integers  $c_0, \dots, c_{p-1} \in \{0, \dots, q-1\}$

1. For  $k = 0, \dots, p-1$ ,  $\mathbf{w}_{c_k}^N = \{s_i \in \mathbf{z}_k : n_i \in N\}$
2. For each  $k \in \{0, \dots, p-1\}$  and  $j = k-1 \pmod{p}$ , either  
**(a)**  $c_k = c_j$  or **(b)**  $c_k = c_j + 1 \pmod{q}$
3. Given  $k \in \{0, \dots, p-1\}$  and  $j = k-1 \pmod{p}$ , **if**  $c_k \neq c_j$  **then**  $\mathbf{w}_{c_k}^N \neq \mathbf{w}_{c_j}^N$
4. For each  $a \in \{0, \dots, q-1\}$ ,  $\exists k \in \{0, \dots, p-1\}$  such that  $c_k = a$
5. There is no integer  $q' \mid q$  ( $q' < q$ ) for which  $\mathbf{w}_f^N = \mathbf{w}_g^N$  whenever  $f, g$  satisfies  
 $f \pmod{q'} = g \pmod{q'}$

For  $k = 0, \dots, p-1$ , let  $b_k = c_k - d \pmod{q}$

Then we can show that properties **C1-C5** are true for  $P = \{\mathbf{x}_0^N, \dots, \mathbf{x}_{q-1}^N\}$  and integers  $b_0, \dots, b_{p-1} \in \{0, \dots, q-1\}$

*Property C1:*

For  $k = 0, \dots, p-1$ ,  $\mathbf{x}_{b_k}^N = \mathbf{w}_j^N$  where  $j = b_k + d \pmod{q}$  (by **E**)

Therefore (from **F1**),  $\mathbf{x}_{b_k}^N = \mathbf{w}_{c_k}^N = \{s_i \in \mathbf{z}_k : n_i \in N\}$

*Property C2:*

For each  $k \in \{0, \dots, p-1\}$  and  $j = k-1 \pmod{p}$ , **E** and **F2** imply either

**(a)**  $b_k = c_k - d \pmod{q} = c_j - d \pmod{q} = b_j$

**(b)**  $b_k = c_k - d \pmod{q} = c_j + 1 - d \pmod{q} = b_j + 1 \pmod{q}$

*Property C3:*

Consider any  $k \in \{0, \dots, p-1\}$  and  $j = k-1 \pmod{p}$ .

Then if  $b_k \neq b_j$ , we have (following from **C2** and **F2**)

**(i)**  $q > 1$

**(ii)**  $b_k = c_k - d \pmod{q} = c_j + 1 - d \pmod{q} = b_j + 1 \pmod{q}$

**(iii)**  $c_k \neq c_j$  (from (i) and (ii))

Therefore, from **F3**,  $\mathbf{x}_{c_k}^N \neq \mathbf{x}_{c_j}^N$ .

Therefore,  $\mathbf{w}_{b_k}^N \neq \mathbf{w}_{b_j}^N$  (since  $\mathbf{x}_{b_i}^N = \mathbf{w}_{c_i}^N$  for  $i = 0, \dots, p-1$ : see **C1**)



*Property C4:*

For each  $a \in \{0, \dots, q-1\}$ ,  $\exists k \in \{0, \dots, p-1\}$  such that  $c_k = a$  (from **F4**).

Therefore there also exists  $k' \in \{0, \dots, p-1\}$  such that

(i)  $c_{k'} = a + d \pmod{q}$

(ii)  $b_{k'} = c_{k'} - d \pmod{q} = a$

*Property C5:*

Suppose there exists an integer  $q' \mid q$  ( $q' < q$ ) for which  $\mathbf{x}_f^N = \mathbf{x}_g^N$  whenever  $f \pmod{q'} = g \pmod{q'}$ .

Consider any  $f', g'$  satisfying  $f' \pmod{q'} = g' \pmod{q'}$ . Then

(a)  $f' - d \pmod{q'} = g' - d \pmod{q'}$

(b)  $(f' - d \pmod{q}) \pmod{q'} = (g' - d \pmod{q}) \pmod{q'}$   
 (by (a) and the fact  $q$  is a multiple of  $q'$ )

(c)  $\mathbf{x}_{f'-d \pmod{q}}^N = \mathbf{x}_{g'-d \pmod{q}}^N$   
 (by (b) and the fact  $\mathbf{x}_f^N = \mathbf{x}_g^N$  whenever  $f \pmod{q'} = g \pmod{q'}$ )

Therefore, from (a) - (c) and **E**

$$- \mathbf{w}_{f'}^N = \mathbf{x}_{f'-d \pmod{q}}^N = \mathbf{x}_{g'-d \pmod{q}}^N = \mathbf{w}_{g'}^N$$

However, since this true for any  $f', g'$  satisfying  $f' \pmod{q'} = g' \pmod{q'}$ , it contradicts **F5**.

Therefore, there cannot be any integer  $q' \mid q$  ( $q' < q$ ) for which  $\mathbf{x}_f^N = \mathbf{x}_g^N$  whenever  $f \pmod{q'} = g \pmod{q'}$

□

**Theorem. S1.10**

Given a node set  $N$  and set of attractors  $\mathbb{C}$ , Procedure S1.9 identifies partial state sequences  $P_1, \dots, P_k$  and sets of attractors  $\mathbb{C}_1, \dots, \mathbb{C}_k$  satisfying

- A:** For  $i = 1, \dots, k$ ,  $P_i$  involves the node set  $N$  (i.e.  $P_i = \{\mathbf{x}_{i_0}^N, \dots, \mathbf{x}_{i_{q-1}}^N\}$ )
- B:** For  $i = 1, \dots, k$ ,  $P_i$  occurs in every attractor  $A \in \mathbb{C}_i$
- C:** For  $i = 1, \dots, k$ ,  $P_i$  does not occur in any attractor  $A \notin \mathbb{C}_i$
- D:** For any  $i, j$  ( $1 \leq i < j \leq k$ ),  $\mathbb{C}_i \cap \mathbb{C}_j = \emptyset$
- E:**  $\mathbb{C}_1 \cup \dots \cup \mathbb{C}_k = \mathbb{C}$
- F:** Given the node set  $N$ , there are no other partial state sequences  $P' \notin \{P_1, \dots, P_k\}$  that occur in any attractor  $A \in \mathbb{C}$  (unless  $P'$  is equivalent to some  $P_i \in \{P_1, \dots, P_k\}$ )

**PROOF**

Note that from Theorem S1.4, any partial state sequence  $Q_j$  created in Step 1 of the procedure must occur in  $A_j$  (when applying Procedure S1.3 to  $N$  and  $A_j \in \mathbb{C}$ )

**Property A**

Every partial state sequence in the procedure is created by applying Procedure S1.3 to  $N$  and some attractor  $A \in \mathbb{C}$ . This will only give partial state sequences involving the input node set  $N$ .

**Properties B, C, D and F**

Since all partial state sequences  $Q_j$  involve the node set  $N$ , Theorem S1.2 implies that if  $Q'_x$  is equivalent to  $Q'_y$ , then

- $Q'_x$  occurs in an attractor  $A \iff Q'_y$  occurs in an attractor  $A$

Moreover, Theorem S1.2 implies that if  $Q'_x$  is **not** equivalent to  $Q'_y$ , then  $Q'_x$  and  $Q'_y$  never occur in the same attractor.

Therefore, from Step 2 and 3,

- B:** For  $i = 1, \dots, k$ ,  $P_i$  occurs in every attractor  $A \in \mathbb{C}_i$
- C:** For  $i = 1, \dots, k$ ,  $P_i$  does not occur in any attractor  $A \notin \mathbb{C}_i$
- D:** For any  $i, j$  ( $1 \leq i < j \leq k$ ),  $\mathbb{C}_i \cap \mathbb{C}_j = \emptyset$
- F:** Given the node set  $N$ , there are no other partial state sequences  $P' \notin \{P_1, \dots, P_k\}$  that occur in any attractor  $A \in \mathbb{C}$  (unless  $P'$  is equivalent to some  $P_i \in \{P_1, \dots, P_k\}$ )

## Property E

In Step 1, every  $A_j \in \mathbb{C}$  is considered and a partial state sequence  $Q_j$  that occurs in  $A_j$  is created.

Since every  $Q_j$  is put into a group  $i$  and  $\mathbb{C}_i = \{A_j : Q_j \text{ is part of the group } i\}$  (by Step 3), there exists  $i \in \{1, \dots, k\}$  for which  $A_j \in \mathbb{C}_i$ .

Therefore, since the procedure only uses attractors from  $\mathbb{C}$

$$\mathbb{C}_1 \cup \dots \cup \mathbb{C}_k = \mathbb{C} \text{ (as required)}$$

□

## Lemma. S1.11

Consider two partial state sequences  $P_x = \{\mathbf{x}_0^N, \dots, \mathbf{x}_{q-1}^N\}$  and  $P_y = \{\mathbf{y}_0^M, \dots, \mathbf{y}_{r-1}^M\}$  (where  $M \supseteq N$ ). Then,

- (a)  $P_x$  occurs in  $P_y$ , and  $P_y$  occurs in an attractor  $A \implies P_x$  occurs in  $A$
- (b)  $P_x$  and  $P_y$  both occur in an attractor  $A \implies P_x$  occurs in  $P_y$

## PROOF

### Part a

Since  $P_x = \{\mathbf{x}_0^N, \dots, \mathbf{x}_{q-1}^N\}$  occurs in  $P_y = \{\mathbf{y}_0^M, \dots, \mathbf{y}_{r-1}^M\}$  ( $M \supseteq N$ ), and  $P_y$  occurs in an  $A = \{\mathbf{z}_0, \dots, \mathbf{z}_{p-1}\}$ , Lemmas S1.23 and S1.24 (in Section S1.4.4) imply that

**A:** The following is true for  $P_x = \{\mathbf{x}_0^N, \dots, \mathbf{x}_{q-1}^N\}$  and some sequence of integers

$$b_0, \dots, b_{r-1} \in \{0, \dots, q-1\}$$

1. For  $k' = 0, \dots, r-1$ ,  $\mathbf{x}_{b_{k'}}^N = \{s_i \in \mathbf{y}_{k'}^M : n_i \in N (\subseteq M)\}$
2. For each  $k' \in \{0, \dots, r-1\}$  and  $j' = k' - 1 \pmod{r}$ , either  
(a)  $b_{k'} = b_{j'}$  or (b)  $b_{k'} = b_{j'} + 1 \pmod{q}$
3. Given  $k' \in \{0, \dots, r-1\}$  and  $j' = k' - 1 \pmod{r}$ , **if**  $b_{k'} \neq b_{j'}$  **then**  $\mathbf{x}_{b_{k'}}^N \neq \mathbf{x}_{b_{j'}}^N$
4. For each  $a \in \{0, \dots, q-1\}$ ,  $\exists k' \in \{0, \dots, r-1\}$  such that  $b_{k'} = a$
5. There is no integer  $q' \mid q$  ( $q' < q$ ) for which  $\mathbf{x}_f^N = \mathbf{x}_g^N$  whenever  $f, g$  satisfies  $f \pmod{q'} = g \pmod{q'}$

**B:** The following is true for  $P_y = \{\mathbf{y}_0^M, \dots, \mathbf{y}_{r-1}^M\}$  and some sequence of integers

$$c_0, \dots, c_{p-1} \in \{0, \dots, r-1\}$$

1. For  $k = 0, \dots, p-1$ ,  $\mathbf{y}_{c_k}^M = \{s_i \in \mathbf{z}_k : n_i \in M\}$
2. For each  $k \in \{0, \dots, p-1\}$  and  $j = k - 1 \pmod{p}$ , either  
(a)  $c_k = c_j$  or (b)  $c_k = c_j + 1 \pmod{r}$
3. Given  $k \in \{0, \dots, p-1\}$  and  $j = k - 1 \pmod{p}$ , **if**  $c_k \neq c_j$  **then**  $\mathbf{y}_{c_k}^M \neq \mathbf{y}_{c_j}^M$
4. For each  $a \in \{0, \dots, r-1\}$ ,  $\exists k \in \{0, \dots, p-1\}$  such that  $c_k = a$
5. There is no integer  $r' \mid r$  ( $r' < r$ ), for which  $\mathbf{y}_f^M = \mathbf{y}_g^M$  whenever  $f, g$  satisfies  $f \pmod{r'} = g \pmod{r'}$

For  $k = 0, \dots, p-1$ , let  $d_k = b_{c_k}$

Then  $d_k \in \{0, \dots, q-1\}$ , since  $c_k \in \{0, \dots, r-1\}$  and  $b_i \in \{0, \dots, q-1\}$  for any  $i \in \{0, \dots, r-1\}$ .

Then, following from **A** and **B** (and the fact that  $N \subseteq M$ )

**C:** The following is true for  $P_x = \{\mathbf{x}_0^N, \dots, \mathbf{x}_{q-1}^N\}$  and the sequence of integers

$d_0, \dots, d_{p-1} \in \{0, \dots, q-1\}$  (proved below)

1. For  $k = 0, \dots, p-1$ ,  $\mathbf{x}_{d_k}^N = \{s_i \in \mathbf{z}_k : n_i \in N\}$
2. For each  $k \in \{0, \dots, p-1\}$  and  $j = k-1 \pmod{p}$ , either  
**(a)**  $d_k = d_j$  or **(b)**  $d_k = d_j + 1 \pmod{q}$
3. Given  $k \in \{0, \dots, p-1\}$  and  $j = k-1 \pmod{p}$ , **if**  $d_k \neq d_j$  **then**  $\mathbf{x}_{d_k}^N \neq \mathbf{x}_{d_j}^N$
4. For each  $a \in \{0, \dots, q-1\}$ ,  $\exists k \in \{0, \dots, p-1\}$  such that  $d_k = a$
5. There is no integer  $q' \mid q$  ( $q' < q$ ) for which  $\mathbf{x}_f^N = \mathbf{x}_g^N$  whenever  $f, g$  satisfies  
 $f \pmod{q'} = g \pmod{q'}$

Lemma S1.23 (in Section S1.4.4) then implies that  $P_x$  occurs in  $A$  (as required).

It just remains to show properties **C1** - **C5** are true

*Property C1:*

Let  $k' = c_k$  in **A1**. Then, from **A1** and **B1**

- For  $k = 0, \dots, p-1$ ,  $\mathbf{x}_{d_k}^N = \mathbf{x}_{b_{k'}}^N = \{s_i \in \mathbf{y}_{k'}^M : n_i \in N\} = \{s_i \in \mathbf{y}_{c_k}^M : n_i \in N\} = \{s_i \in \mathbf{z}_k : n_i \in N (\subseteq M)\}$

*Property C2:*

We consider all possible cases from **A2** and **B2**.

Given any  $c_j \in \{1, \dots, r\}$ , let

- $k' = c_j + 1 \pmod{r}$  (in **A2**)
- $j' = k' - 1 \pmod{r} = c_j$  (in **A2**)

Then, for each  $k \in \{0, \dots, p-1\}$  and  $j = k-1 \pmod{p}$ , either

**Case: B2(a)**

$$d_k = b_{c_k} = b_{c_j} = d_j$$

**Case: B2(b) and A2(a)**

$$d_k = b_{c_k} = b_{c_j+1 \pmod{r}} = b_{k'} = b_{j'} = b_{c_j} = d_j$$

**Case: B2(b) and A2(b)**

$$d_k = b_{c_k} = b_{c_j+1 \pmod{r}} = b_{k'} = b_{j'} + 1 \pmod{q} = b_{c_j} + 1 \pmod{q} = d_j + 1 \pmod{q}$$

*Property C3:*

Given any  $c_j \in \{1, \dots, r\}$ , let

- $k' = c_j + 1 \pmod{r}$  (in **A3**)
- $j' = k' - 1 \pmod{r} = c_j$  (in **A3**)

Then, given  $k \in \{0, \dots, p-1\}$  and  $j = k - 1 \pmod{p}$ , **if**  $d_k \neq d_j$

- (a)  $b_{c_k} \neq b_{c_j}$
- (b)  $c_k \neq c_j$  (otherwise (a) would be incorrect)
- (c)  $c_k = c_j + 1 \pmod{r}$  (by (b) and **B2**)
- (d)  $k' \neq j'$  (by (b), (c) and choice of  $k', j'$ )
- (e)  $\mathbf{x}_{b_{k'}}^N \neq \mathbf{x}_{b_{j'}}^N$  (by **A3** and (d))
- (f)  $\mathbf{x}_{b_{c_k}}^N \neq \mathbf{x}_{b_{c_j}}^N$  (by (c), (e) and choice of  $k', j'$ )
- (g)  $\mathbf{x}_{d_k}^N \neq \mathbf{x}_{d_j}^N$

(as required)

*Property C4:*

By **A4**. For each  $a \in \{0, \dots, q-1\}$ ,  $\exists k' \in \{0, \dots, r-1\}$  such that  $b_{k'} = a$

By **B4**. For each  $k' \in \{0, \dots, r-1\}$ ,  $\exists k \in \{0, \dots, p-1\}$  such that  $c_k = k'$

Therefore, for each  $a \in \{0, \dots, q-1\}$ ,  $\exists k \in \{0, \dots, p-1\}$  such that  $d_k = b_{c_k} = b_{k'} = a$

*Property C5:*

This follows directly from **A5**.

## Part b

Suppose  $P_x = \{\mathbf{x}_0^N, \dots, \mathbf{x}_{q-1}^N\}$  and  $P_y = \{\mathbf{y}_0^M, \dots, \mathbf{y}_{r-1}^M\}$  ( $M \supseteq N$ ) both occur in an attractor  $A = \{\mathbf{z}_0, \dots, \mathbf{z}_{p-1}\}$

Applying Procedure S1.6 to  $P_y$  and  $N$  identifies a partial state sequence  $P^* = \{\mathbf{w}_0^N, \dots, \mathbf{w}_{q^*-1}^N\}$  that occurs in  $P_y$  (by Theorem S1.8)

Therefore, by **part a** of this Lemma,  $P^*$  occurs in  $A$  (since  $P^*$  occurs in  $P_y$  and  $P_y$  occurs in  $A$ )

Therefore, by Theorem S1.2,  $P_x$  is equivalent to  $P^*$  (since  $P^*$  and  $P_x$  both occur in  $A$ )

Therefore, by Theorem S1.7,  $P_x$  occurs in  $P_y$

□

**Lemma. S1.12**

Consider two partial state sequences  $P_x = \{\mathbf{x}_0^N, \dots, \mathbf{x}_{q-1}^N\}$  and  $P_y = \{\mathbf{y}_0^M, \dots, \mathbf{y}_{r-1}^M\}$ , and two sets of attractors  $\mathbb{C}_x$  and  $\mathbb{C}_y$  for which

1.  $M \supseteq N$
2.  $P_x$  occurs in every attractor  $A \in \mathbb{C}_x$
3.  $P_x$  does not occur in any attractor  $A \notin \mathbb{C}_x$
4.  $P_y$  occurs in every attractor  $A \in \mathbb{C}_y$
5.  $P_y$  does not occur in any attractor  $A \notin \mathbb{C}_y$

Then, either

- (a)  $\mathbb{C}_x \cap \mathbb{C}_y = \emptyset$
- (b)  $P_x$  occurs in  $P_y$  **and**  $\mathbb{C}_y \subseteq \mathbb{C}_x$

**PROOF**

Suppose there exists an attractor  $A \in \mathbb{C}_x \cap \mathbb{C}_y$  (i.e. (a) is not true).

Then  $P_x$  and  $P_y$  both occur in  $A$ . Therefore, by Lemma S1.11,  $P_x$  occurs in  $P_y$ .

Now consider any attractor  $A \in \mathbb{C}_y$ . Since  $P_x$  occurs in  $P_y$ , and  $P_y$  occurs in  $A$ , Lemma S1.11 implies that  $P_x$  also occurs in  $A$ . Therefore  $A \in \mathbb{C}_x$  (and so  $\mathbb{C}_y \subseteq \mathbb{C}_x$ ).

□

## S1.4.2 Proofs for Section S1.2

### Theorem. S1.14

At the end of Procedure S1.13, the following is true

$P$  is an intersection sequence

$\iff$

$P$  is equivalent to a partial state sequence  $P^* \in \{P^*, \mathbb{C}\} \in \mathbf{S}$

### PROOF:

*Case  $\implies$*

Since  $P = \{\mathbf{x}_0^N, \dots, \mathbf{x}_{q-1}^N\}$  is an intersection sequence, Definition 4 (in the main text) implies that there is a set of attractors  $\mathbb{C}$  for which

1.  $P$  occurs in every attractor  $A \in \mathbb{C}$
2.  $P$  does not occur in any attractor  $A \notin \mathbb{C}$

Moreover,  $P$  must be equivalent to some partial state sequence  $P^* = \{\mathbf{w}_0^N, \dots, \mathbf{w}_{q-1}^N\}$  identified in Step 2 of Procedure S1.13, when the node set  $N$  is analysed (because of (f) in Step 2)

Therefore, by Theorem S1.2,

1.  $P^*$  occurs in every attractor  $A \in \mathbb{C}$
2.  $P^*$  does not occur in any attractor  $A \notin \mathbb{C}$

and so  $\{P^*, \mathbb{C}\}$  is added to  $\mathbf{S}$  in Step 3 (of Procedure S1.13).

It just remains to show that  $\{P^*, \mathbb{C}\}$  is never removed from  $\mathbf{S}$  in Step 4 of any loop.  $\{P^*, \mathbb{C}\}$  could only be removed in Step 4 if there was a pair  $\{Q = \{\mathbf{y}_0^M, \dots, \mathbf{y}_{r-1}^M\}, \mathbb{D}\}$  for which

- (i)  $M \supset N$
- (ii)  $\mathbb{D} = \mathbb{C}$
- (iii)  $Q$  occurs in every attractor  $A \in \mathbb{D} = \mathbb{C}$  (because of Step 2(b) and (ii))

However, this would be impossible since  $P$  is an intersection sequence, and so property 3 of Definition 4 implies that

- Given a larger set  $M \supset N$ , there is no partial state sequence  $Q$  for the node set  $M$  that occurs in every attractor  $A \in \mathbb{C}$  ( $= \mathbb{D}$ )

Case  $\Leftarrow$

We show that  $P^*$  is an intersection sequence, that intersects at  $\mathbb{C}$  (i.e. the 3 properties of Definition 4 (main text) hold for  $P^*$  and  $\mathbb{C}$ ). It then follows from Theorem S1.2 and Definition 4 (main text) that the same must be true for any  $P$ , which is equivalent to  $P^*$ .

Properties 1 and 2 are true because of (b) and (c) in Step 2 of Procedure S1.13. Therefore,

(b)  $P^* = \{\mathbf{w}_0^N, \dots, \mathbf{w}_{q-1}^N\}$  occurs in every attractor  $A \in \mathbb{C}$

(c)  $P^* = \{\mathbf{w}_0^N, \dots, \mathbf{w}_{q-1}^N\}$  does not occur in any attractor  $A \notin \mathbb{C}$

Now, we show that property 3 holds (noting that every node set  $M$  is analysed at some point in the procedure).

If a partial state sequence  $Q$  (for a node set  $M \supset N$ ) occurs in every  $A \in \mathbb{C}$ , (b), (c) and Lemma S1.12 implies that

- $Q$  occurs in every attractor  $A \in \mathbb{C}$
- $Q$  does not occur in any attractor  $A \notin \mathbb{C}$

Let  $M$  be the largest such set (i.e. it is impossible to identify another partial state sequence  $Q'$  for a node set  $L \supset M \supset N$ ). Then, when  $M$  is analysed in the procedure, we get

**Step 2:**  $Q$  would be identified (or an equivalent partial state sequence would be identified).

**Step 3:**  $\{Q, \mathbb{C}\}$  would be added to  $\mathbf{S}$

**Step 4:** Either

**A : Case M is analysed after N**

$\{P^*, \mathbb{C}\}$  is removed from  $\mathbf{S}$

**B : Case M is analysed before N**

$\{Q, \mathbb{C}\}$  is kept in  $\mathbf{S}$  and  $\{P^*, \mathbb{C}\}$  is removed from  $\mathbf{S}$  when it is analysed later

Therefore, in order for  $\{P^*, \mathbb{C}\}$  to be in  $\mathbf{S}$  at the end of the procedure, there cannot be any partial state sequence  $Q$  (for a larger node set  $M \supset N$ ) that occurs in every  $A \in \mathbb{C}$ . Therefore Property 3 of Definition 4 is satisfied.

□



**Theorem. S1.15**

Consider a partial state sequence  $P = \{\mathbf{x}_0^N, \dots, \mathbf{x}_{q-1}^N\}$  for which

1.  $P$  occurs in a single attractor  $A = \{\mathbf{z}_0, \dots, \mathbf{z}_{p-1}\}$
2.  $P$  does not occur in any attractor  $A' \neq A$

Then, given that  $V$  is the set of all nodes,

- (a) Given a node set  $M$  satisfying  $N \subset M \subset V$ , it is impossible to find an intersection sequence that involves the node set  $M$  and occurs in  $A$ .
- (b) Given the node set  $V$ , it is possible to find an intersection sequence  $P'$  that involves the node set  $V$  and occurs in  $A$  (usually  $A$  itself).

**PROOF:**

Applying Procedure S1.3 for the node set  $V$  and an attractor  $A$ , gives a partial state sequence  $P'$  that involves the node set  $V$  and occurs in  $A$  (by Theorem S1.4)

Now consider any partial state sequence  $Q = \{\mathbf{y}_0^M, \dots, \mathbf{y}_{r-1}^M\}$  that involves a node set  $M$  ( $N \subset M$ ) and occurs in the attractor  $A$ . Then, from 1., 2. and Lemma S1.12,

- $P$  occurs in  $Q$
- $Q$  does not occur in any attractor  $A' \neq A$

Therefore,  $A$  is the only attractor for which  $Q$  occurs in  $A$  (this includes  $Q = P'$ , if  $M = V$ )

Therefore,

- (a) Given a node set  $M$  satisfying  $N \subset M \subset V$ , any partial state sequence  $Q$  that occurs in  $A$  will fail Definition 4 (main text). Since,
  1.  $Q$  occurs in  $A$  (from above)
  2.  $Q$  does not occur in any attractor  $A' \neq A$  (from above)
  3. There exists a partial state sequence  $P'$  (for a larger node set  $V \supset M$ ) that occurs in  $A$ .
- (b)  $P'$  is an intersection sequences since  $P'$  and  $A$  satisfy the 3 properties of Definition 4 (main text). Namely,
  1.  $P'$  occurs in  $A$  (from above)
  2.  $P'$  does not occur in any attractor  $A' \neq A$  (from above)
  3. There is no node set larger than  $V$

Therefore, parts (a) and (b) of the Theorem are true.

□

**Theorem. S1.17**

At the end of Procedure S1.16, the following is true

$P$  that is core to some set of attractors  $\mathbb{C}$  (Definition 5A is satisfied)

$\iff$

$P$  is equivalent to a partial state sequence  $P^* \in \{P^*, \mathbb{C}\} \in \mathbf{T}$

**PROOF:**

*Case  $\Leftarrow$*

We show that the 3 properties of Definition 5A hold for any  $P^* \in \{P^*, \mathbb{C}\} \in \mathbf{T}$ .

It then follows from Theorem S1.2, Theorem S1.7, Definition 5A and Definition S1.1 that the same must be true for any  $P$ , which is equivalent to  $P^*$ .

$\{P^* = \{\mathbf{x}_0^N, \dots, \mathbf{x}_{q-1}^N\}, \mathbb{C}\}$  is added to  $\mathbf{T}$  when Steps 1 - 5 of Procedure S1.16 are carried out for some intersection sequence  $P'$  (that intersects at  $\mathbb{C}$ ). We consider Steps 1 - 5 for  $P'$ , when showing the 3 properties of Definition 5A hold for  $P^*$

Property 1 is satisfied because Step 4 implies  $P^*$  occurs in  $P'$  (which intersects at  $\mathbb{C}$ )

Property 2 is satisfied because of the following.

Consider any intersection sequence  $Q$  (for a node set  $M$ ) that intersects at  $\mathbb{D}$  (where  $\mathbb{D} \cap \mathbb{C} \neq \emptyset$ ). We need to show that there is an intersection sequence  $Q'$  (for a node set  $M' \supseteq M \cup N$ ) that occurs in every node set  $A \in \mathbb{D} \cap \mathbb{C}$ .

Let  $Q'$  be any intersection sequence (for a node set  $M'$ ) satisfying

- (a)  $M' \supseteq M$
- (b)  $Q'$  intersects at  $\mathbb{D}' \supseteq \mathbb{D} \cap \mathbb{C}$  (this also implies  $\mathbb{D}' \cap \mathbb{C} \neq \emptyset$ )
- (c) There is no intersection sequence  $Q^*$  (for a larger node set  $M^* \supset M' \supseteq M$ ) that intersects at  $\mathbb{D}^* \supseteq (\mathbb{D}' \cap \mathbb{C}) \supseteq (\mathbb{D} \cap \mathbb{C})$

Now, at least one  $Q'$  must exist since  $Q$  itself satisfies (a) and (b). Therefore, either  $Q$  satisfies (a), (b) and (c) or we can find  $Q' = Q^*$  (for the largest possible node set  $M^* \supseteq M$ ) that does.  $Q'$  is then identified in Step 1 of the procedure and so

- (d)  $M' \supseteq N$  (from Step 3)
- (e)  $M' \supseteq M \cup N$  (from (a) and (d))

Moreover, because of (b) and Definition 4

- (f)  $Q'$  occurs in every  $A \in \mathbb{D} \cap \mathbb{C}$

Therefore, because of (e) and (f), we have found a suitable  $Q'$ .

Property 3 is satisfied because of the following. Consider any partial state sequence  $P''$ , for a larger node set  $N'' \supset N$ . Then, since  $N = M_1 \cap \dots \cap M_k$  in Step 3, there must be a node set  $M_i$  ( $i \in \{1, \dots, k\}$ ) satisfying

-  $M_i \not\subseteq N''$

Then, for the corresponding intersection sequence  $Q_i$  (for the node set  $M_i$ ) identified in Step 1

- (i)  $Q_i$  intersects at  $\mathbb{D}_i$ , where  $\mathbb{D}_i \cap \mathbb{C} \neq \emptyset$  (by Step 1a)
- (ii) There is no intersection sequence  $Q^*$  (for a larger node set  $M^* \supset M_i$ ) that intersects at  $\mathbb{D}^* \supseteq (\mathbb{D}_i \cap \mathbb{C})$  (by Step 1b)
- (ii) There is no intersection sequence,  $Q^*$  (for a larger node set  $M^* \supset M_i$ ) that occurs in every attractor  $A \in \mathbb{D}_i \cap \mathbb{C}$  (by (ii) and Definition 4)

Therefore, it is impossible to find an intersection sequence  $Q^*$  (for a node set  $M^* \supseteq M_i \cup N''$ ) that occurs in every attractor  $A \in \mathbb{D}_i \cap \mathbb{C}$ . Therefore,  $P''$  cannot be core to  $\mathbb{C}$ , since property 2 of Definition 5A would fail (for  $Q = Q_i$ ).

*Case*  $\implies$

Suppose  $P = \{\mathbf{x}_0^N, \dots, \mathbf{x}_{q-1}^N\}$  is core to some set of attractors  $\mathbb{C}$  (say). Then, Definition 5A (main text) implies that

1.  $P$  occurs in an intersection sequence  $P'$ , which intersects at  $\mathbb{C}$  ( $P$  can equal  $P'$ ).
2. If an intersection sequence  $Q$  (for a node set  $M$ ) intersects at  $\mathbb{D}$  (where  $\mathbb{D} \cap \mathbb{C} \neq \emptyset$ ), then there exists an intersection sequence  $Q'$  (for a node set  $M' \supseteq M \cup N$ ) that occurs in every attractor  $A \in \mathbb{D} \cap \mathbb{C}$
3. 1 and 2 are not true for any larger partial state sequence  $P''$  (for a node set  $N'' \supset N$ )

Now,  $P' = \{\mathbf{y}_0^{N'}, \mathbf{y}_1^{N'}, \dots, \mathbf{y}_{r-1}^{N'}\}$  (from 1. above) will be analysed in Procedure S1.16.

In Step 1, intersection sequences  $Q_1, \dots, Q_k$  (for node sets  $M_1, \dots, M_k$  resp) are identified where (for  $i = 1, \dots, k$ )

- A:**  $Q_i$  intersects at  $\mathbb{D}_i$ , where  $\mathbb{D}_i \cap \mathbb{C} \neq \emptyset$
- B:** There is no intersection sequence  $Q_i^*$  (for a node set  $M_i^* \supset M_i$ ) that intersects at  $\mathbb{D}_i^* \supseteq (\mathbb{D}_i \cap \mathbb{C})$
- C:** There is no intersection sequence  $Q_i^*$  (for a node set  $M_i^* \supset M_i$ ) that occurs in every attractor  $A \in \mathbb{D}_i \cap \mathbb{C}$  (by **B** and Definition 4)

Moreover,  $P' \in \{Q_1, \dots, Q_k\}$ , since

**A'**:  $P'$  intersects at  $\mathbb{C}$ , where  $\mathbb{C} \cap \mathbb{C} = \mathbb{C} \neq \emptyset$

**B'**: There is no intersection sequence  $P''$  (for a node set  $M'' \supset N'$ ) that intersects at  $\mathbb{D}' \supseteq \mathbb{C}$  (by Definition 4)

Now, because of **A** and 2. above, the following are true for  $i = 1, \dots, k$

**D**: There exists an intersection sequence  $Q_i^*$  (for a node set  $M_i^* \supseteq M_i \cup N$ ) that occurs in every attractor  $A \in \mathbb{D}_i \cap \mathbb{C}$

Therefore, comparing **C** and **D**, it must be the case that  $N \subseteq M_i$  (for  $i = 1, \dots, k$ ). Therefore,

**E**:  $N \subseteq (M_1 \cap \dots \cap M_k) \subseteq N'$  (since  $P' \in \{Q_1, \dots, Q_k\}$ )

Now, in Steps 3 - 5 of Procedure S1.16 (when  $P'$  is analysed), we identify a node set  $N^*$  and partial state sequence  $P^*$  where

- $N^* = (M_1 \cap \dots \cap M_k) \subseteq N'$
- $P^* = \{\mathbf{w}_0^{N^*}, \dots, \mathbf{w}_{q^*-1}^{N^*}\}$  occurs in  $P'$
- The pair  $\{P^*, \mathbb{C}\}$  is added to the set **T**

Therefore, by part  $\Leftarrow$  of this Theorem,

- $P^*$  is core to  $\mathbb{C}$

Therefore,  $P$  and  $P^*$  both occur in  $P'$  and are both core to  $\mathbb{C}$ .

Therefore, because of 2. and 3. and Theorem S1.7, it must be the case that  $N = N^*$  and  $P$  is equivalent to  $P^*$  ( $\in \{P^*, \mathbb{C}\} \in \mathbf{T}$ ) as required

□

### S1.4.3 Proofs for Section S1.3

#### Theorem. S1.19

Assume Procedure S1.18 begins with every partition sequence. Then, at the end of Procedure S1.18, the following is true

$S$  is a subsystem (Definition 6 is satisfied)

$\iff$

$S$  is equivalent to a partial state sequence  $S^* \in \mathbf{U}$

#### PROOF:

Case  $\Leftarrow$

We show that the 3 properties of Definition 6 hold for any  $S^* \in \mathbf{U}$ .

It then follows from Theorem S1.2, Theorem S1.7, Definition 6 and Definition S1.1 that the same must be true for any  $S$ , which is equivalent to  $S^*$ .

$S^* = \{\mathbf{x}_0^N, \dots, \mathbf{x}_{q-1}^N\}$  is added to  $\mathbf{U}$  when Steps 1 - 5 of Procedure S1.18 are carried out for some partition sequence  $P = \{\mathbf{y}_0^M, \dots, \mathbf{y}_{r-1}^M\}$ . We consider Steps 1 - 5 for  $P$ , when showing the 3 properties of Definition 6 hold for  $S^*$

Property 1 is satisfied because Step 4 implies  $S^*$  occurs in  $P$ .

Property 2 is satisfied because of the following. Consider any partition sequence  $P'$  (for a node set  $M' \subset M$ ) that occurs in  $P$ . Then, Lemma S1.11 implies that  $P'$  occurs in an attractor  $A$ , whenever  $P$  occurs in  $A$ .

Therefore,  $P'$  is identified in Step 1, and  $N \subseteq (M \setminus M')$  (by Step 3 and the fact  $M' = M_i$  for some  $i \in \{1, \dots, k\}$ ).

Therefore,  $M' \cap N = \emptyset$  and property 2 holds

Property 3 is satisfied because of the following. Consider any partial state sequence  $S'$  (for a larger node set  $N' \supset N$ ) that occurs in  $P$ .

Then, since  $N = M \setminus (M_1 \cup \dots \cup M_k)$  in Step 3, there must be a node set  $M_i$  ( $i \in \{1, \dots, k\}$ ) satisfying

-  $M_i \cap N' \neq \emptyset$

(since  $S'$  occurs in  $P = \{\mathbf{y}_0^M, \dots, \mathbf{y}_{r-1}^M\}$ , and so  $N' \subseteq M$ )

Therefore property 2 of Definition 6 would fail.

Case  $\implies$

Suppose  $S = \{\mathbf{x}_0^N, \dots, \mathbf{x}_{q-1}^N\}$  is subsystem. Then, Definition 6 implies that there exists a partition sequence  $P = \{\mathbf{y}_0^M, \dots, \mathbf{y}_{r-1}^M\}$  for which

1.  $S$  occurs in  $P$  (and so  $N \subseteq M$ )
2. If another partition sequence  $P'$  (for a node set  $M' \subset M$ ) occurs in  $P$ , then  $M' \cap N = \emptyset$
3. 1 and 2 are not true for any partial state sequence  $S'$ , for a larger node set  $N' \supset N$

Now,  $P$  (from above) will be analysed in Procedure S1.18. In Step 1 partition sequences  $P_1, \dots, P_k$  (for node sets  $M_1, \dots, M_k$  resp) are identified where (for  $i = 1, \dots, k$ )

**A:**  $M_i \subset M$

**B:**  $P_i$  and  $P$  both occur in some attractor  $A_i$

**C:**  $P_i$  occurs in  $P$  (by **A**, **B** and Lemma S1.11)

Therefore, because of **A**, **C** and 2. above, the following are true

**D:** For  $i = 1, \dots, k$ ,  $M_i \cap N = \emptyset$

**E:**  $(M_1 \cup \dots \cup M_k) \cap N = \emptyset$  (by **D**)

**F:**  $N \subseteq M \setminus (M_1 \cup \dots \cup M_k)$  (by **A**, **E** and 1. from above)

Now, in Steps 3 - 5 of Procedure S1.18 (when  $P$  is analysed), we identify a node set  $N^*$  and partial state sequence  $S^*$  where

- $N^* = M \setminus (M_1 \cup \dots \cup M_k) \supseteq N$
- $S^* = \{\mathbf{w}_0^{N^*}, \dots, \mathbf{w}_{q^*-1}^{N^*}\}$  occurs in  $P$
- $S^*$  is added to the set  $\mathbf{U}$

Therefore, by part  $\Leftarrow$  of this Theorem,

- $S^*$  is a subsystem and satisfies properties 1 - 3

Therefore, because of 1. - 3. and Theorem S1.7, it must be the case that  $N = N^*$  and  $S$  is equivalent to  $S^* \in \mathbf{U}$ , as required

**Theorem. S1.20**

Given an attractor  $A$  and node  $n_i$ , there exists a subsystem  $S = \{\mathbf{x}_0^N, \mathbf{x}_1^N, \dots, \mathbf{x}_{q-1}^N\}$  for which

- (a)  $n_i \in N$
- (b)  $S$  occurs in  $A$

**PROOF :**

Given the node set  $V$  (set of all nodes) and the attractor  $A$ , Procedure S1.3 identifies a partial state sequence  $P$  that occurs in  $A$  (by Theorem S1.4). Now, let  $\mathbb{C}$  be the set of attractors for which

1.  $P$  occurs in every attractor  $A \in \mathbb{C}$
2.  $P$  does not occur in any attractor  $A \notin \mathbb{C}$

(Note: In a Boolean network model,  $P = A$  and  $\mathbb{C} = \{A\}$ )

Therefore, since  $V$  is the largest possible node set, 1., 2. and Definition 4 imply  $P$  is an intersection sequence that intersects at  $\mathbb{C}$ .

Moreover, no other intersection sequence  $P'$  (that is not equivalent to  $P$ ) can intersect at  $\mathbb{C}$  (because of 1 and 2 and the fact that  $V$  is the largest node set possible). Therefore,  $P$  is exclusive to  $\mathbb{C}$  and is a partition sequence (by Definition 5).

Therefore, it is possible to find a partition sequence  $P$  (for a node set  $M = V$ ) for which

- (a)  $n_i \in M$
- (b)  $P$  occurs in  $A$

Now carry out the following loop

**while()** {

If a partition sequence  $P_i$  (for a node set  $M_i$ ) exists such that

- $n_i \in M_i$
- $M_i \subset M$
- $P_i$  occurs in  $P$  (and  $P_i$  occurs in  $A$  by Lemma S1.11)

Then, replace  $M$  by  $M_i$ , replace  $P$  by  $P_i$  and execute the loop again.

Otherwise, **exit loop**

}

At the end of the loop we have a partition sequence  $P$  (for the node set  $M$ ) satisfying

**A:**  $n_i \in M$

**B:**  $P$  occurs in  $A$

**C:** If a partition sequence  $P'$  (for a node set  $M' \subset M$ ) occurs in  $P$ , then  $M' \cap \{n_i\} = \emptyset$

Now, we apply Steps 1-5 of Procedure S1.18 to  $P$ . In Step 1, partition sequences  $P_1, \dots, P_k$  (for node sets  $M_1, \dots, M_k$  resp) are identified where

**D:** For  $i = 1, \dots, k$ ,  $M_i \subset M$  (by Step 1a)

**E:** For  $i = 1, \dots, k$ ,  $P_i$  and  $P$  both occur in some attractor  $A_i$  (by Step 1b)

**F:** For  $i = 1, \dots, k$ ,  $P_i$  occurs in  $P$  (by **D**, **E** and Lemma S1.11)

**G:** For  $i = 1, \dots, k$ ,  $M_i \cap \{n_i\} = \emptyset$  (by **C**, **D** and **F**)

Then, in Steps 3-5, we identify a node set  $N$  and partial state sequence  $S = \{\mathbf{x}_0^N, \mathbf{x}_1^N, \dots, \mathbf{x}_{q-1}^N\}$  where

**H:**  $N = M \setminus (M_1 \cup \dots \cup M_k)$  (by Step 3)

**I:**  $n_i \in N$  (by **A**, **G** and **H**)

**J:**  $S$  occurs in  $P$  (by Step 4)

**K:**  $S$  occurs in  $A$  (by **B**, **J** and Lemma S1.11)

**L:**  $S$  is added to the set **U** (by Step 5)

Therefore, by **L** and part  $\Leftarrow$  of Theorem S1.19,

**M:**  $S$  is a subsystem

Therefore, because of **I**, **K** and **M**, the theorem is satisfied.

□



### S1.4.4 Supplementary Lemmas

**Lemma S1.21.** Consider an attractor  $A = \{\mathbf{z}_0, \dots, \mathbf{z}_{p-1}\}$ , and two partial state sequences  $P_x = \{\mathbf{x}_0^N, \dots, \mathbf{x}_{q-1}^N\}$  and  $P_w = \{\mathbf{w}_0^N, \dots, \mathbf{w}_{r-1}^N\}$  for the same node set  $N$ .

Now suppose,

**A:** The following are true for  $P_x = \{\mathbf{x}_0^N, \dots, \mathbf{x}_{q-1}^N\}$  and some sequence of integers  $b_0, \dots, b_{p-1} \in \{0, \dots, q-1\}$

1. For  $k = 0, \dots, p-1$ ,  $\mathbf{x}_{b_k}^N = \{s_i \in \mathbf{z}_k : n_i \in N\}$
2. For each  $k \in \{0, \dots, p-1\}$  and  $j = k-1 \pmod{p}$ , either  
**(a)**  $b_k = b_j$  or **(b)**  $b_k = b_j + 1 \pmod{q}$
3. Given  $k \in \{0, \dots, p-1\}$  and  $j = k-1 \pmod{p}$ , **if**  $b_k \neq b_j$  **then**  $\mathbf{x}_{b_k}^N \neq \mathbf{x}_{b_j}^N$
4. For each  $a \in \{0, \dots, q-1\}$ ,  $\exists k \in \{0, \dots, p-1\}$  such that  $b_k = a$

**B:** The following are true for  $P_w = \{\mathbf{w}_0^N, \dots, \mathbf{w}_{r-1}^N\}$  and some sequence of integers  $c_0, \dots, c_{p-1} \in \{0, \dots, r-1\}$

1. For  $k = 0, \dots, p-1$ ,  $\mathbf{w}_{c_k}^N = \{s_i \in \mathbf{z}_k : n_i \in N\}$
2. For each  $k \in \{0, \dots, p-1\}$  and  $j = k-1 \pmod{p}$ , either  
**(a)**  $c_k = c_j$  or **(b)**  $c_k = c_j + 1 \pmod{r}$
3. Given  $k \in \{0, \dots, p-1\}$  and  $j = k-1 \pmod{p}$ , **if**  $c_k \neq c_j$  **then**  $\mathbf{w}_{c_k}^N \neq \mathbf{w}_{c_j}^N$
4. For each  $a \in \{0, \dots, r-1\}$ ,  $\exists k \in \{0, \dots, p-1\}$  such that  $c_k = a$

Then, letting  $l = b_0$  and  $m = c_0$

**C:** For every  $i \geq 0$

1.  $\exists k_i \in \{0, \dots, p-1\}$  for which  $b_{k_i} = l + i \pmod{q}$  and  $c_{k_i} = m + i \pmod{r}$
2.  $\mathbf{x}_{l+i \pmod{q}}^N = \mathbf{w}_{m+i \pmod{r}}^N$

### PROOF

From **A1** and **B1**,

**D:** For  $k = 0, \dots, p-1$ ,  $\mathbf{x}_{b_k}^N = \mathbf{w}_{c_k}^N = \{s_i \in \mathbf{z}_k : n_i \in N\}$

Additionally, note that

**E:** If  $q = 1$ , then  $r = 1$  (because of the (i)-(iv) below)

- (i)** For  $k = 0, \dots, p-1$ ,  $b_k = 0$
- (ii)** For  $k = 0, \dots, p-1$ ,  $\mathbf{w}_{c_k}^N = \mathbf{x}_0^N$  (by (i) and **D**)
- (iii)** Given  $k \in \{0, \dots, p-1\}$  and  $j = k-1 \pmod{p}$ ,  $c_k = c_j$  (by (ii) and **B3**)
- (iv)**  $r = 1$  and  $c_k = 0$ , for  $k = 0, \dots, p-1$  (by (iii) and **B4**)

We want to prove **C** is true. We prove **C1** here. **C2** then follows from **C1** and **D**.

For the case  $i = 0$ , letting  $k_i = 0$  ensures  $b_{k_i} = b_0 = l = l + i \pmod{q}$  and  $c_{m_i} = c_0 = m = m + i \pmod{r}$  (as required)

For the case  $q = 1$ , we have  $r = 1$  (by **E**) and so  $k_i = 0$ , for every  $i > 0$ . This then ensures  $b_{k_i} = b_0 = 0 = l + i \pmod{1}$  and  $c_{m_i} = c_0 = 0 = m + i \pmod{1}$  (as required)

Therefore, it just remains to prove the case  $i > 0, q > 1, r > 1$ . We do this by induction on  $i$  (case  $i = 0$  already done). Suppose **C1** is true for  $i - 1$  ( $\geq 0$ ), so that

$$\star \quad \exists \quad k_{i-1} \in \{0, \dots, p-1\} \text{ for which } b_{k_{i-1}} = l + i - 1 \pmod{q} \text{ and } c_{k_{i-1}} = m + i - 1 \pmod{r}$$

Because of **A2**, **A3** and **A4** and the fact that  $q > 1$ , there must exist a chain of integers

$$- j_0, \dots, j_d, k$$

for which

- (a) For  $t = 0, \dots, d$ ,  $j_t = k_{i-1} + t \pmod{p}$
- (b)  $k = j_d + 1 \pmod{p}$
- (c)  $b_{j_0} = \dots = b_{j_d} \neq b_k$  and  $b_k = b_{j_d} + 1 \pmod{q}$
- (d)  $\mathbf{x}_{b_{j_0}}^N = \dots = \mathbf{x}_{b_{j_d}}^N \neq \mathbf{x}_{b_k}^N$

Then, because of (a)- (d), **B3**, **D** and the fact that  $q > 1$  and  $r > 1$ ,

- (e)  $c_{j_0} = \dots = c_{j_d} \neq c_k$  and  $c_k = c_{j_d} + 1 \pmod{r}$
- (f)  $\mathbf{w}_{c_{j_0}}^N = \dots = \mathbf{w}_{c_{j_d}}^N \neq \mathbf{w}_{c_k}^N$

Then letting  $k_i = k$  (and noting that  $b_{k_{i-1}} = b_{j_0}$  and  $c_{k_{i-1}} = c_{j_0}$ ), (a) - (f) and  $\star$  imply that

- (g)  $b_{k_i} = b_{j_d} + 1 \pmod{q}$   
 $= b_{k_{i-1}} + 1 \pmod{q}$   
 $= (l + i - 1 \pmod{q} + 1) \pmod{q}$   
 $= l + i \pmod{q}$
- (h)  $c_{k_i} = c_{j_d} + 1 \pmod{r}$   
 $= c_{k_{i-1}} + 1 \pmod{r}$   
 $= (m + i - 1 \pmod{r} + 1) \pmod{r}$   
 $= m + i \pmod{r}$

as required and so **C1** (and **C2**) holds.

□

**Lemma S1.22.** Consider an attractor  $A = \{\mathbf{z}_0, \dots, \mathbf{z}_{p-1}\}$ , and two partial state sequences  $P_x = \{\mathbf{x}_0^N, \dots, \mathbf{x}_{q-1}^N\}$  and  $P_w = \{\mathbf{w}_0^N, \dots, \mathbf{w}_{r-1}^N\}$  for the same node set  $N$ .

Now suppose,

- A:** The following are true for  $P_x = \{\mathbf{x}_0^N, \dots, \mathbf{x}_{q-1}^N\}$  and some sequence of integers  $b_0, \dots, b_{p-1} \in \{0, \dots, q-1\}$
1. For  $k = 0, \dots, p-1$ ,  $\mathbf{x}_{b_k}^N = \{s_i \in \mathbf{z}_k : n_i \in N\}$
  2. For each  $k \in \{0, \dots, p-1\}$  and  $j = k-1 \pmod{p}$ , either  
**(a)**  $b_k = b_j$  or **(b)**  $b_k = b_j + 1 \pmod{q}$
  3. Given  $k \in \{0, \dots, p-1\}$  and  $j = k-1 \pmod{p}$ , **if**  $b_k \neq b_j$  **then**  $\mathbf{x}_{b_k}^N \neq \mathbf{x}_{b_j}^N$
  4. For each  $a \in \{0, \dots, q-1\}$ ,  $\exists k \in \{0, \dots, p-1\}$  such that  $b_k = a$
- B:** The following are true for  $P_w = \{\mathbf{w}_0^N, \dots, \mathbf{w}_{r-1}^N\}$  and some sequence of integers  $c_0, \dots, c_{p-1} \in \{0, \dots, r-1\}$
1. For  $k = 0, \dots, p-1$ ,  $\mathbf{w}_{c_k}^N = \{s_i \in \mathbf{z}_k : n_i \in N\}$
  2. For each  $k \in \{0, \dots, p-1\}$  and  $j = k-1 \pmod{p}$ , either  
**(a)**  $c_k = c_j$  or **(b)**  $c_k = c_j + 1 \pmod{r}$
  3. Given  $k \in \{0, \dots, p-1\}$  and  $j = k-1 \pmod{p}$ , **if**  $c_k \neq c_j$  **then**  $\mathbf{w}_{c_k}^N \neq \mathbf{w}_{c_j}^N$
  4. For each  $a \in \{0, \dots, r-1\}$ ,  $\exists k \in \{0, \dots, p-1\}$  such that  $c_k = a$

Then, letting  $h$  be the highest common factor of  $q$  and  $r$ ,

- (i)  $\mathbf{x}_f^N = \mathbf{x}_g^N$  whenever  $f \pmod{h} = g \pmod{h}$  ( $0 \leq f \leq q-1, 0 \leq g \leq q-1$ )
- (ii)  $P_z = \{\mathbf{x}_0^N, \dots, \mathbf{x}_{h-1}^N\}$  satisfies Properties 1 and 2 of Definition 3

## PROOF

From Lemma S1.21, the following is true for  $l = b_0$  and  $m = c_0$

- C:** For every  $i \geq 0$
1.  $\exists k_i \in \{0, \dots, p-1\}$  for which  $b_{k_i} = l + i \pmod{q}$  and  $c_{k_i} = m + i \pmod{r}$
  2.  $\mathbf{x}_{l+i \pmod{q}}^N = \mathbf{w}_{m+i \pmod{r}}^N$

Let  $h$  be the highest common factor of  $q$  and  $r$  and consider any integers  $f, g$  ( $\leq q-1$ ) satisfying  $f \pmod{h} = g \pmod{h}$ . Then we have,

**D:**  $g = f + i_1 h$  for some integer  $i_1$

**E:**  $h = i_2 q + i_3 r$  for some integers  $i_2, i_3$  (by Euclid's algorithm)

Let  $i' = f - l + i_1 i_3 r + i_4 q$

(where  $i_4$  is any non-negative integer, larger enough to ensure  $i' \geq 0, i' - i_1 i_3 r \geq 0$ ).

Then **C**, **D** and **E** leads to

$$\begin{aligned}
\mathbf{F}: \quad g &= f + i_1 h \\
&= f + i_1 i_2 q + i_1 i_3 r \\
&= l + i' - i_4 q + i_1 i_2 q \\
&= l + i' \pmod{q}
\end{aligned}$$

$$\begin{aligned}
\mathbf{G}: \quad \mathbf{x}_f^N &= \mathbf{x}_{l+i'-i_1 i_3 r - i_4 q}^N \\
&= \mathbf{x}_{l+i'-i_1 i_3 r \pmod{q}}^N \\
&= \mathbf{w}_{m+i'-i_1 i_3 r \pmod{r}}^N \\
&= \mathbf{w}_{m+i'}^N \pmod{r} \\
&= \mathbf{x}_{l+i'}^N \pmod{q} \\
&= \mathbf{w}_g^N
\end{aligned}$$

Therefore part (i) of the Lemma is true because  $\mathbf{x}_f^N = \mathbf{x}_g^N$  whenever  $f \pmod{h} = g \pmod{h}$  ( $0 \leq f \leq q-1$ ,  $0 \leq g \leq q-1$ )

Now, letting  $s_k = b_k \pmod{h}$ , for  $k = 0, \dots, p-1$

**H:** The following are true for  $P_z = \{\mathbf{x}_0^N, \dots, \mathbf{x}_{h-1}^N\}$  and integers  $s_0, \dots, s_{p-1} \in \{0, \dots, h-1\}$

1. For  $k = 0, \dots, p-1$ ,  $\mathbf{x}_{s_k}^N = \mathbf{x}_{b_k}^N = \{s_i \in \mathbf{z}_k : n_i \in N\}$  (by **G**)
2. For each  $k \in \{0, \dots, p-1\}$  and  $j = k-1 \pmod{p}$ , either
  - (a)  $s_k = b_k \pmod{h} = b_j \pmod{h} = b_j$
  - (b)  $s_k = b_k \pmod{h} = (b_j+1 \pmod{q}) \pmod{h} = b_j+1 \pmod{h} = s_j+1 \pmod{h}$   
(because  $q$  is a multiple of  $h$ )

Therefore, part (ii) of the Lemma is true because  $P_z = \{\mathbf{x}_0^N, \dots, \mathbf{x}_{h-1}^N\}$  satisfies the first two properties of Definition 3 (as required).

□

**Lemma S1.23.** Consider a partial state sequence  $P = \{\mathbf{x}_0^N, \dots, \mathbf{x}_{q-1}^N\}$  and an attractor  $A = \{\mathbf{z}_0, \dots, \mathbf{z}_{p-1}\}$

$P$  occurs in  $A$  (i.e. Definition 3 is satisfied)

$\iff$

The following are true for  $P = \{\mathbf{x}_0^N, \dots, \mathbf{x}_{q-1}^N\}$  and some sequence of integers  $b_0, \dots, b_{p-1} \in \{0, \dots, q-1\}$

1. For  $k = 0, \dots, p-1$ ,  $\mathbf{x}_{b_k}^N = \{s_i \in \mathbf{z}_k : n_i \in N\}$
2. For each  $k \in \{0, \dots, p-1\}$  and  $j = k-1 \pmod{p}$ , either
  - (a)  $b_k = b_j$  or
  - (b)  $b_k = b_j + 1 \pmod{q}$
3. Given  $k \in \{0, \dots, p-1\}$  and  $j = k-1 \pmod{p}$ , **if**  $b_k \neq b_j$  **then**  $\mathbf{x}_{b_k}^N \neq \mathbf{x}_{b_j}^N$
4. For each  $a \in \{0, \dots, q-1\}$ ,  $\exists k \in \{0, \dots, p-1\}$  such that  $b_k = a$
5. There is no integer  $q' \mid q$  ( $q' < q$ ) for which  $\mathbf{x}_f^N = \mathbf{x}_g^N$  whenever  $f, g$  satisfies  $f \pmod{q'} = g \pmod{q'}$

## PROOF:

**Case:**  $\implies$

Suppose  $P$  occurs in  $A$ . Then, properties 1 and 2 follow directly from Properties 1 and 2 of Definition 3.

We now show properties 3, 4 and 5 hold.

*Property 3*

We use proof by contradiction to show property 3. We show that if the property does **not** hold, it is possible to find a smaller partial state sequence  $P' = \{\mathbf{y}_0^N, \dots, \mathbf{y}_{q'-1}^N\}$  and integers  $c_0, \dots, c_{p-1} \in \{0, \dots, q' - 1\}$  ( $q' < q$ ) that satisfy properties 1 and 2 of Definition 3 (thus contradiction property 3 of Definition 3 and the fact that  $P$  occurs in  $A$ )

Suppose there exists  $k' \in \{0, \dots, p - 1\}$  and  $j' = k' - 1 \pmod{p}$  for which  $b_{k'} \neq b_{j'}$  and  $\mathbf{x}_{b_{k'}}^N = \mathbf{x}_{b_{j'}}^N$ . Then, Property 2 implies there's an integer  $h$  for which

- $h = b_{j'} \in \{0, \dots, q - 1\}$
- $h + 1 \pmod{q} = b_{k'}$  (since  $b_{k'} \neq b_{j'}$ )
- $\mathbf{x}_h^N = \mathbf{x}_{h+1}^N \pmod{q}$

Take  $h$  (above),  $q' = q - 1$  and consider the partial state sequence  $P' = \{\mathbf{y}_0^N, \dots, \mathbf{y}_{q'-1}^N\}$  where

- $\mathbf{y}_i^N = \mathbf{x}_i^N$  for  $i = 0, \dots, h - 1$  (if  $h > 0$ )
- $\mathbf{y}_i^N = \mathbf{x}_{i+1}^N$  for  $i = h, \dots, q' - 1$  (if  $h < q - 1$ )

Then, for  $m = 0, \dots, p - 1$ , let

- (i)  $c_m = b_m$ , if  $b_m < h$
- (ii)  $c_m = b_m$ , if  $b_m = h < q' = q - 1$
- (iii)  $c_m = 0$ , if  $b_m = h = q' = q - 1$
- (iv)  $c_m = b_m - 1$ , if  $b_m > h$

(Note: Since each  $b_m \in \{0, \dots, q - 1\}$  and  $h \in \{0, \dots, q - 1\}$ , each  $c_m \in \{0, \dots, q - 2\} = \{0, \dots, q' - 1\}$ )

Now, from Property 2, for each  $k \in \{0, \dots, p - 1\}$  and  $j = k - 1 \pmod{p}$  either

- (a)  $b_j = b_k$
- (b)  $b_j = b_k - 1$  (when (a) is not true and  $b_k > b_j \geq 0$ )
- (c)  $b_j = q - 1$  (when (a) is not true and  $b_k = 0$ )

Considering all relevant cases (i) - (iv) and (a) - (c), we can show that  $P' = \{\mathbf{y}_0^N, \dots, \mathbf{y}_{q'-1}^N\}$  satisfies properties 1 and 2 of Definition 3.

i.e. The following are true for  $c_0, \dots, c_{p-1} \in \{0, \dots, q' - 1\}$  (defined above)

1. For  $k = 0, \dots, p - 1$ ,  $\mathbf{y}_{c_k}^N = \{s_i \in \mathbf{z}_k : n_i \in N\}$ . This is because of the following
  - (i) If  $b_k < h \leq q - 1$ , then
$$\mathbf{y}_{c_k}^N = \mathbf{y}_{b_k}^N = \mathbf{x}_{b_k}^N = \{s_i \in \mathbf{z}_k : n_i \in N\}$$
  - (ii) If  $b_k = h < q' = q - 1$ , then
$$\mathbf{y}_{c_k}^N = \mathbf{y}_{b_k}^N = \mathbf{y}_h^N = \mathbf{x}_{h+1}^N = \mathbf{x}_h^N = \mathbf{x}_{b_k}^N = \{s_i \in \mathbf{z}_k : n_i \in N\}$$
  - (iii) If  $b_k = h = q' = q - 1$ , then since  $h + 1 \pmod{q} = 0$ 

$$\mathbf{y}_{c_k}^N = \mathbf{y}_0^N = \mathbf{x}_0^N = \mathbf{x}_{h+1 \pmod{q}}^N = \mathbf{x}_h^N = \mathbf{x}_{b_k}^N = \{s_i \in \mathbf{z}_k : n_i \in N\}$$
  - (iv) If  $b_k > h$ , then
$$\mathbf{y}_{c_k}^N = \mathbf{y}_{b_k-1}^N = \mathbf{x}_{b_k}^N = \{s_i \in \mathbf{z}_k : n_i \in N\}$$
2. For each  $k \in \{0, \dots, p - 1\}$  and  $j = k - 1 \pmod{p}$ , either (a)  $c_k = c_j$  or (b)  $c_k = c_j + 1 \pmod{q'}$ . This is because of the following
  - (i) If  $b_k < h \leq q - 1$ , then either
    - (a)  $c_k = b_k = b_j = c_j$
    - (b)  $c_k = b_k = b_j + 1 \pmod{q'} = c_j + 1 \pmod{q'}$   
(since  $b_j \geq 0$  and  $b_j < h \leq q' = q - 1$ )
    - (c)  $c_k = b_k = 0 = q - 1 \pmod{q'} = b_j \pmod{q'} =$  either  $c_j$  or  $c_j + 1 \pmod{q'}$   
(depending on whether or not  $b_j = h$  or  $b_j > h$ )
  - (ii and iii) If  $b_k = h \leq q - 1$ , then since  $c_k = b_k \pmod{q'}$ , either
    - (a)  $c_k = b_k \pmod{q'} = b_j \pmod{q'} = c_j$   
(since  $b_j = b_k = h$ )
    - (b)  $c_k = b_k \pmod{q'} = b_j + 1 \pmod{q'} = c_j + 1 \pmod{q'}$   
(since  $b_j < h$  and  $b_j \geq 0$ )
    - (c)  $c_k = b_k \pmod{q'} = 0 = q - 1 \pmod{q'} = b_j \pmod{q'} =$  either  $c_j$  or  $c_j + 1 \pmod{q'}$   
(depending on whether or not  $b_j = h$  or  $b_j > h$ )
  - (iv) If  $b_k > h$ , then either
    - (a)  $c_k = b_k - 1 = b_j - 1 = c_j$   
(since  $b_j = b_k > h$ )
    - (b)  $c_k = b_k - 1 = b_j = b_j \pmod{q'} =$  either  $c_j$  or  $c_j + 1 \pmod{q'}$   
(depending on whether or not  $b_j = h$  or  $b_j > h$ )
    - (c) Case not possible

#### Property 4

Now, from Property 2, for each  $k \in \{0, \dots, p - 1\}$  and  $j = k - 1 \pmod{p}$  either

- (a)  $b_k = b_j$
- (b)  $b_k = b_j + 1 \pmod{q}$  and  $q > 0$

Let  $c$  be the number of times that  $b_k \neq b_j$  when  $k \in \{1, \dots, p-1\}$  (i.e.  $c$  is number of times we get case (b))

Then,  $b_{p-1} = b_0 + c \pmod{q}$ .

Therefore, since either (a) or (b) must be true for  $k = 0$  and  $j = p-1$ , either

(c)  $c = 0$  and  $b_0 = \dots = b_{p-1}$

(d)  $c = eq - 1$  for some positive integer  $e$  ( $q > 0$ )

(e)  $c = eq$  for some positive integer  $e$  ( $q > 0$ )

In cases (d) and (e), Property 4 must hold because  $b_k$  increases by either 0 or 1  $\pmod{q}$  as  $k$  increases (from 0 to  $p-1$ ). This would imply that every  $a \in \{0, \dots, q-1\}$  occurs at least once.

In case (c), properties 1 and 2 of Definition 3 would hold for the partial state sequence  $P' = \{\mathbf{y}_0^N\} = \{\mathbf{x}_{b_0}^N\}$ . Therefore, since  $P = \{\mathbf{x}_0^N, \dots, \mathbf{x}_{q-1}^N\}$  occurs in  $A$ , it must be the case that  $q = 1$  (Otherwise property 3 of Definition 3 would fail, using  $P'$  and  $b_0 = \dots = b_{p-1} = 0$ ). Property 4 would then follow, since for each  $a \in \{0\}$ ,  $b_0 = \dots = b_{p-1} = 0$ .

*Property 5*

We use proof by contradiction to show property 5. We show that if the property does **not** hold, it is possible to find a smaller partial state sequence  $P' = \{\mathbf{y}_0^N, \dots, \mathbf{y}_{q'-1}^N\}$  and integers  $c_0, \dots, c_{p-1} \in \{0, \dots, q'-1\}$  ( $q' < q$ ) that satisfy properties 1 and 2 of Definition 3 (thus contradiction property 3 of Definition 3 and the fact that  $P$  occurs in  $A$ )

Suppose there is an integer  $q' \mid q$  ( $q' < q$ ) for which  $\mathbf{x}_f^N = \mathbf{x}_g^N$  whenever  $f \pmod{q'} = g \pmod{q'}$ .

Let,

-  $P' = \{\mathbf{x}_0^N, \dots, \mathbf{x}_{q'-1}^N\}$  (where each  $\mathbf{x}_i^N$  is taken from  $P$ )

-  $c_i = b_i \pmod{q'}$ , for  $i = 0, \dots, p-1$

Then, properties 1 and 2 of Definition 3 are true for  $P' = \{\mathbf{y}_0^N, \dots, \mathbf{y}_{q'-1}^N\}$  and integers  $c_0, \dots, c_{p-1} \in \{0, \dots, q'-1\}$  (defined above). This is because

1. For  $k = 0, \dots, p-1$ ,  $\mathbf{x}_{c_k}^N = \mathbf{x}_{b_k \pmod{q'}}^N = \mathbf{x}_{b_k}^N = \{s_i \in \mathbf{z}_k : n_i \in N\}$

2. For each  $k \in \{0, \dots, p-1\}$  and  $j = k-1 \pmod{p}$ , either

(a)  $c_k = b_k \pmod{q'} = b_j \pmod{q'} = c_j$

(a)  $c_k = b_k \pmod{q'} = (b_j + 1 \pmod{q}) \pmod{q'} = b_j + 1 \pmod{q'} = c_j + 1 \pmod{q'}$   
(since  $q' \mid q$ )

**Case:**  $\Leftarrow$

Suppose properties 1 - 5 are true for  $P = \{\mathbf{x}_0^N, \mathbf{x}_1^N, \dots, \mathbf{x}_{q-1}^N\}$  and some sequence of integers  $b_0, \dots, b_{p-1} \in \{0, \dots, q-1\}$

Then, we want to show that  $P = \{\mathbf{x}_0^N, \mathbf{x}_1^N, \dots, \mathbf{x}_{q-1}^N\}$  occurs in  $A$  (i.e. the 3 properties of Definition 3 are satisfied). Properties 1 and 2 follow directly from Properties 1 and 2 of this Lemma. Therefore, it just remains to show property 3 of Definition 3.

If property 3 were not true, it would be possible to find a smaller partial state sequence  $P' = \{\mathbf{y}_0^N, \mathbf{y}_1^N, \dots, \mathbf{y}_{q'-1}^N\}$  and integers  $c_0, \dots, c_{p-1} \in \{0, \dots, q'-1\}$  ( $q' < q$ ) that also satisfied properties 1 and 2 (of this Lemma and Definition 3)

Let  $P' = \{\mathbf{y}_0^N, \dots, \mathbf{y}_{q'-1}^N\}$  be the smallest such sequence (in terms of number of partial states  $q'$ ).

Then  $P'$  occurs in  $A$  and part  $\implies$  of this Lemma would ensure Properties 1 - 5 of this Lemma hold (for  $P'$ ).

Therefore, by Lemma S1.22, there is an integer  $h$  (highest common factor of  $q$  and  $q'$ ) for which

- $h \leq q' < q$
- $h \mid q$
- $\mathbf{x}_f^N = \mathbf{x}_g^N$  whenever  $f \pmod{h} = g \pmod{h}$  (in  $P$ )

Therefore, if property 3 of Definition 3 were not true for  $P$ , property 5 of the Lemma would fail.

Therefore, property 3 of Definition 3 must be true and  $P$  must occur in  $A$ .

□

**Lemma S1.24.** Consider two partial state sequence  $P_x = \{\mathbf{x}_0^N, \dots, \mathbf{x}_{q-1}^N\}$  and  $P_y = \{\mathbf{y}_0^M, \dots, \mathbf{y}_{r-1}^M\}$ , where  $M \supseteq N$

$P_x$  occurs in  $P_y$  (i.e. Definition S1.5 is satisfied)

$\iff$

The following are true for  $P_x = \{\mathbf{x}_0^N, \dots, \mathbf{x}_{q-1}^N\}$  and some sequence of integers  $b_0, \dots, b_{r-1} \in \{0, \dots, q-1\}$

1. For  $k = 0, \dots, r-1$ ,  $\mathbf{x}_{b_k}^N = \{s_i \in \mathbf{y}_k^M : n_i \in N (\subseteq M)\}$
2. For each  $k \in \{0, \dots, r-1\}$  and  $j = k-1 \pmod{r}$ , either  
**(a)**  $b_k = b_j$  or **(b)**  $b_k = b_j + 1 \pmod{q}$
3. Given  $k \in \{0, \dots, r-1\}$  and  $j = k-1 \pmod{r}$ , **if**  $b_k \neq b_j$  **then**  $\mathbf{x}_{b_k}^N \neq \mathbf{x}_{b_j}^N$
4. For each  $a \in \{0, \dots, r-1\}$ ,  $\exists k \in \{0, \dots, r-1\}$  such that  $b_k = a$
5. There is no integer  $q' \mid q$  ( $q' < q$ ) for which  $\mathbf{x}_f^N = \mathbf{x}_g^N$  whenever  $f, g$  satisfies  $f \pmod{q'} = g \pmod{q'}$



## PROOF:

This Lemma can be proved in an analogous way to Lemma S1.23.

In particular, in the proof of Lemma S1.23,

- replace  $P$  by  $P_x$
- replace  $A$  by  $P_y$ ,
- replace  $\mathbf{z}_k$  by  $\mathbf{y}_k^M$
- replace  $p$  by  $r$
- replace Definition 3 by Definition S1.5

and note that similar changes can also be made to adapt Lemmas S1.21 and S1.22.

□

**Lemma S1.25.** Consider a node set  $N$  and attractor  $A = \{\mathbf{z}_0, \mathbf{z}_1, \dots, \mathbf{z}_{p-1}\}$ .

After applying Procedure S1.3 to  $N$  and  $A$ , we get a partial state sequence  $P = \{\mathbf{x}_0^N, \dots, \mathbf{x}_{q-1}^N\}$  and sequence of integers  $b_0, \dots, b_{p-1} \in \{0, \dots, q-1\}$  for which the following are true

1. For  $k = 0, \dots, p-1$ ,  $\mathbf{x}_{b_k}^N = \{s_i \in \mathbf{z}_k : n_i \in N\}$
2. For each  $k \in \{0, \dots, p-1\}$  and  $j = k-1 \pmod{p}$ , either  
(a)  $b_k = b_j$  or (b)  $b_k = b_j + 1 \pmod{q}$
3. Given  $k \in \{0, \dots, p-1\}$  and  $j = k-1 \pmod{p}$ , **if**  $b_k \neq b_j$  **then**  $\mathbf{x}_{b_k}^N \neq \mathbf{x}_{b_j}^N$
4. For each  $a \in \{0, \dots, q-1\}$ ,  $\exists k \in \{0, \dots, p-1\}$  such that  $b_k = a$
5. There is no integer  $q' \mid q$  ( $q' < q$ ) for which  $\mathbf{x}_f^N = \mathbf{x}_g^N$  whenever  $f, g$  satisfies  
 $f \pmod{q'} = g \pmod{q'}$

## PROOF

First note that  $b_0, \dots, b_{p-1} \in \{0, \dots, q-1\}$  by Step 8. Also note that, once  $b_k$  has been specified during the procedure, it can only be altered in Step 8.

We now show the 5 properties of above are satisfied for  $P$ ,  $A$  and  $b_0, \dots, b_{p-1}$  (defined in the procedure itself). For properties 1 - 3, we consider the cases  $k = 0$  and  $k > 0$  separately

**Properties 1 -3 : Case  $k = 0$**

*Property 1*

The initialisation ensures

**A:**  $b_0 = 0$

**B:**  $\mathbf{x}_{b_0}^N = \{s_i \in \mathbf{z}_0 : n_i \in N\}$ .

(Note:  $b_0 = 0$  is not altered in Step 8, since  $b_0 = 0$  and  $q \geq 1$ ).

Therefore, Property 1 is satisfied

*Properties 2 and 3*

When  $k = 0$ ,  $j = k - 1 \pmod{p} = p - 1$  and  $b_k = b_0 = 0$  (by **A**).

Then, because of Steps 1 and 6, one of the following is true by the end of Step 6

(a)  $q^* = 1$ ,  $b_{p-1} = b_j = 0$  and  $\mathbf{x}_0^N = \mathbf{x}_{b_0}^N = \mathbf{x}_{b_k}^N = \mathbf{x}_{b_j}^N$

(b)  $q^* = b_{p-1} = b_j$  and  $\mathbf{x}_0^N = \mathbf{x}_{b_0}^N = \mathbf{x}_{b_k}^N = \mathbf{x}_{b_j}^N$

(c)  $q^* = b_{p-1} + 1 = b_j + 1$  and  $\mathbf{x}_0^N = \mathbf{x}_{b_0}^N = \mathbf{x}_{b_k}^N \neq \mathbf{x}_{b_j}^N$

Then, since  $q \mid q^*$  ( $q^* = aq$  for some positive integer  $a$ ) in Step 7, Step 7 implies either

(a)  $b_j = 0$  and  $\mathbf{x}_0^N = \mathbf{x}_{b_k}^N = \mathbf{x}_{b_j}^N$

(b)  $b_j \pmod{q} = 0$  and  $\mathbf{x}_0^N = \mathbf{x}_{b_k}^N = \mathbf{x}_{b_j}^N$

(c)  $b_j \pmod{q} = q - 1$  and  $\mathbf{x}_0^N = \mathbf{x}_{b_k}^N \neq \mathbf{x}_{b_j}^N = \mathbf{x}_{q-1}^N$

Therefore, since  $b_k = b_0 = 0$  (by **A**), the following are true at the end of Step 8

(a)  $b_k = b_j = 0$  and  $\mathbf{x}_{b_k}^N = \mathbf{x}_{b_j}^N = \mathbf{x}_0^N$

(b)  $b_k = b_j = 0$  and  $\mathbf{x}_{b_k}^N = \mathbf{x}_{b_j}^N = \mathbf{x}_0^N$

(c)  $b_k = b_j + 1 \pmod{q}$  and  $\mathbf{x}_{b_k}^N = \mathbf{x}_0^N \neq \mathbf{x}_{q-1}^N = \mathbf{x}_{b_j}^N$

Because of (a), (b) and (c) above, Property 2 is satisfied.

Property 3 is satisfied because **if**  $b_k \neq b_j$ , **then** (c) above must be true and  $\mathbf{x}_{b_k}^N \neq \mathbf{x}_{b_j}^N$  (as required)

**Properties 1 -3 : Case  $k = 1, \dots, p - 1$  (and  $p > 1$ )**

When  $p > 1$ , Step 3 is applied for every  $k = 1, \dots, p - 1$ .

Consider any  $k \in \{1, \dots, p - 1\}$ .

*Property 1*

If the condition in Step 3 is satisfied,  $\mathbf{x}_{b_k}^N = \{s_i \in \mathbf{z}_k : n_i \in N\}$  is true after Step 3. If the condition is not satisfied,  $\mathbf{x}_{b_k}^N = \{s_i \in \mathbf{z}_k : n_i \in N\}$  is true after Step 5.

As mentioned earlier,  $b_k$  can then only be altered in Step 8, when  $b_k$  is replaced by  $b_k \pmod{q}$ . However, because of Step 7b,  $\mathbf{x}_{b_k}^N = \{s_i \in \mathbf{z}_k : n_i \in N\}$  would remain unaltered.

Therefore Property 1 is satisfied.

*Properties 2 and 3*

Consider any  $k \in \{1, \dots, p - 1\}$  and  $j = k - 1 \pmod{p}$  (where  $p > 1$ )

From steps 2, 3, 4 and 5, either (a) or (b) are true depending on whether or not the condition in Step 3 is satisfied

(a)  $b_k = b_j$  and  $\mathbf{x}_{b_k}^N = \mathbf{x}_{b_j}^N$

(b)  $b_k = b_j + 1$  and  $\mathbf{x}_{b_k}^N \neq \mathbf{x}_{b_j}^N$

Now let  $f_k = b_k \pmod{q}$  and  $f_j = b_j \pmod{q}$ , where  $q \mid q^*$  is the integer identified in Step 7. Then, after Step 7, either

(a)  $f_k = f_j$  and  $\mathbf{x}_{f_k}^N = \mathbf{x}_{b_k}^N = \mathbf{x}_{b_j}^N = \mathbf{x}_{f_j}^N$

(b)  $f_k = f_j + 1 \pmod{q}$  and  $\mathbf{x}_{f_k}^N = \mathbf{x}_{b_k}^N \neq \mathbf{x}_{b_j}^N = \mathbf{x}_{f_j}^N$

Therefore after Step 8, either of the following are true (as required)

(a)  $b_k = b_j$  and  $\mathbf{x}_{b_k}^N = \mathbf{x}_{f_k}^N = \mathbf{x}_{f_j}^N = \mathbf{x}_{b_j}^N$

(b)  $b_k = b_j + 1 \pmod{q}$  and  $\mathbf{x}_{b_k}^N = \mathbf{x}_{f_k}^N \neq \mathbf{x}_{f_j}^N = \mathbf{x}_{b_j}^N$

Because of (a) and (b) above, Property 2 is satisfied.

Property 3 is satisfied because **if**  $b_k \neq b_j$ , **then** (b) above must be true and  $\mathbf{x}_{b_k}^N \neq \mathbf{x}_{b_j}^N$  (as required)

**Property 4**

Initially,  $b_0 = 0$ .

Then, for each  $k \in \{1, \dots, p-1\}$  and  $j = k-1$ , Steps 2 - 5 imply that at the end of Step 7 either

(a)  $b_k = b_j$

(b)  $b_k = b_j + 1$

Therefore, as  $k$  increases from 0 to  $p-1$ ,  $b_k$  increases in intervals of 1.

Moreover, since  $q \leq q^* \leq b_{p-1} + 1$  (from Steps 1, 6 and 7), there exists  $b_0, \dots, b_d$  that satisfy the following at the end of Step 7

(i) For  $i = 0, \dots, d$ ,  $b_i \in \{0, \dots, q-1\}$

(ii) For each  $a \in \{0, \dots, q-1\}$ ,  $\exists k \in \{0, \dots, d\}$  such that  $b_k = a$

Moreover, after Step 8,  $b_0, \dots, b_d$  remain unchanged (because of (i)).

Therefore, property 4 is satisfied

**Property 5**

In Step 7,  $q$  ( $q \mid q^*$ ) is chosen to be the smallest integer for which  $\mathbf{x}_f^N = \mathbf{x}_g^N$  whenever  $f \pmod q = g \pmod q$

If there were a smaller  $q' < q$ , ( $q' \mid q$ ) for which  $\mathbf{x}_f^N = \mathbf{x}_g^N$  whenever  $f \pmod{q'} = g \pmod{q'}$ , then it would have been identified in Step 7 (since it is also the case that  $q' \mid q^*$ )

□
